# Supplementary material for: Synthesis and Activity of Ionic Antioxidant-Functionalized PAMAMs and PPIs Dendrimers
Source: MDPI journal article supplement (doi:10.3390/polym14173513), 2022-08-27
Supplement: s1 [file s1]

Figure S1 :  $^1\text{H}$  NMR of PPI-1-PhA in  $\text{CD}_3\text{OD}$

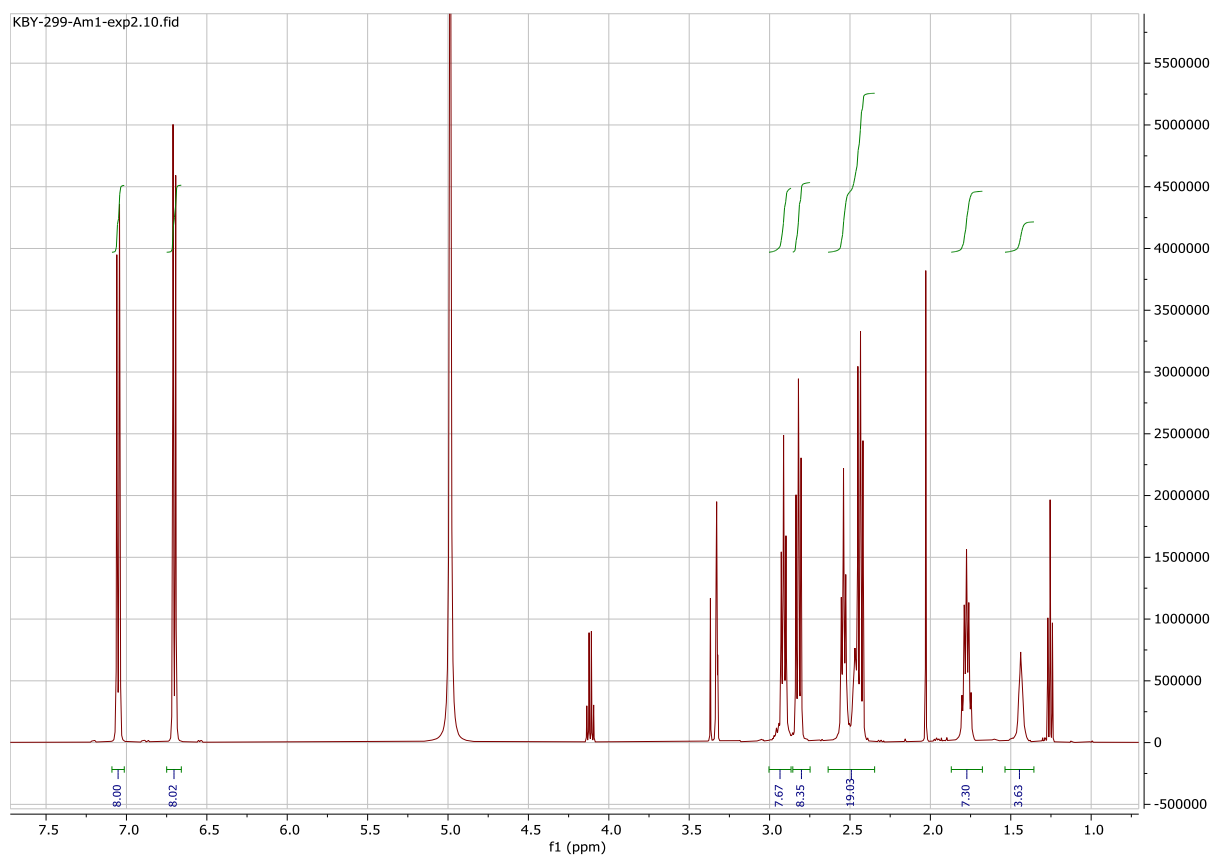

Figure S2 :  $^{13}\text{C}$  NMR of PPI-1-PhA in  $\text{CD}_3\text{OD}$

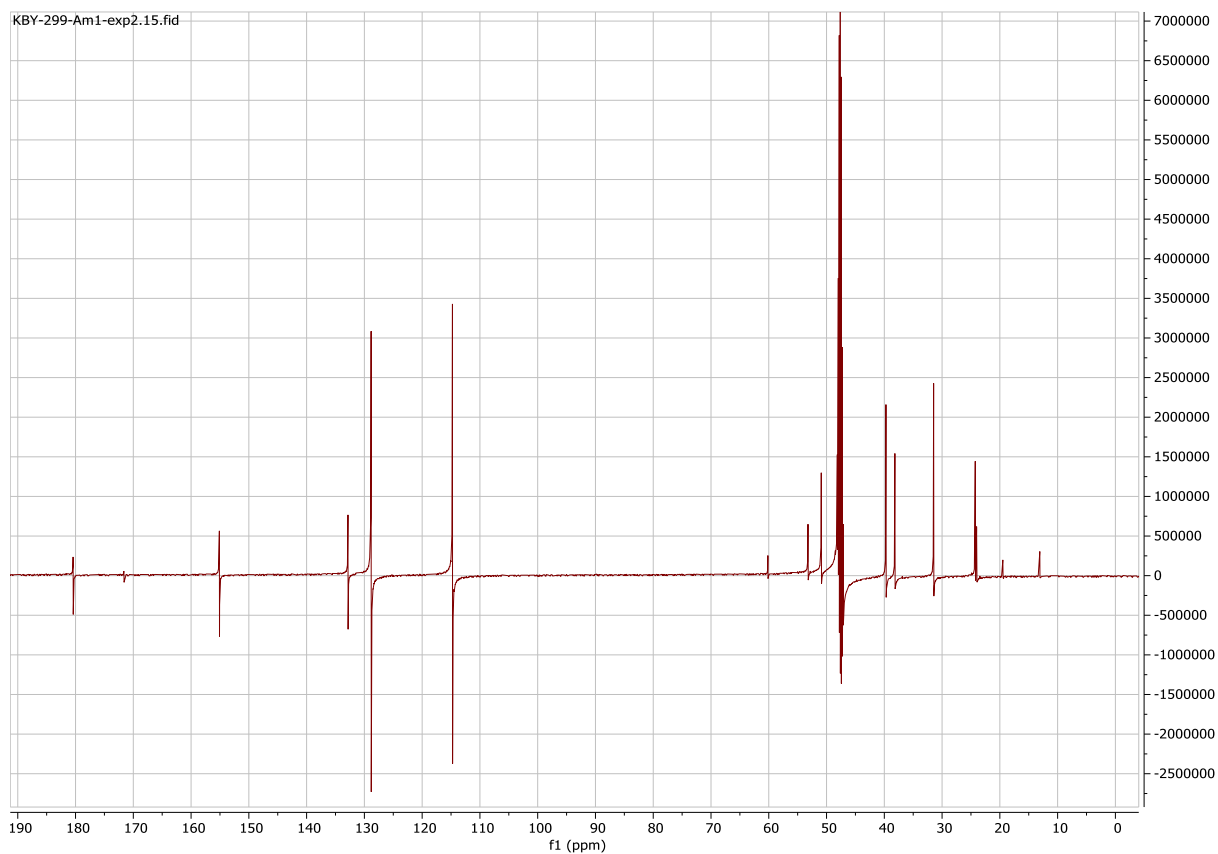

Figure S3 : COSY NMR of PPI-1-PhA in CD<sub>3</sub>OD

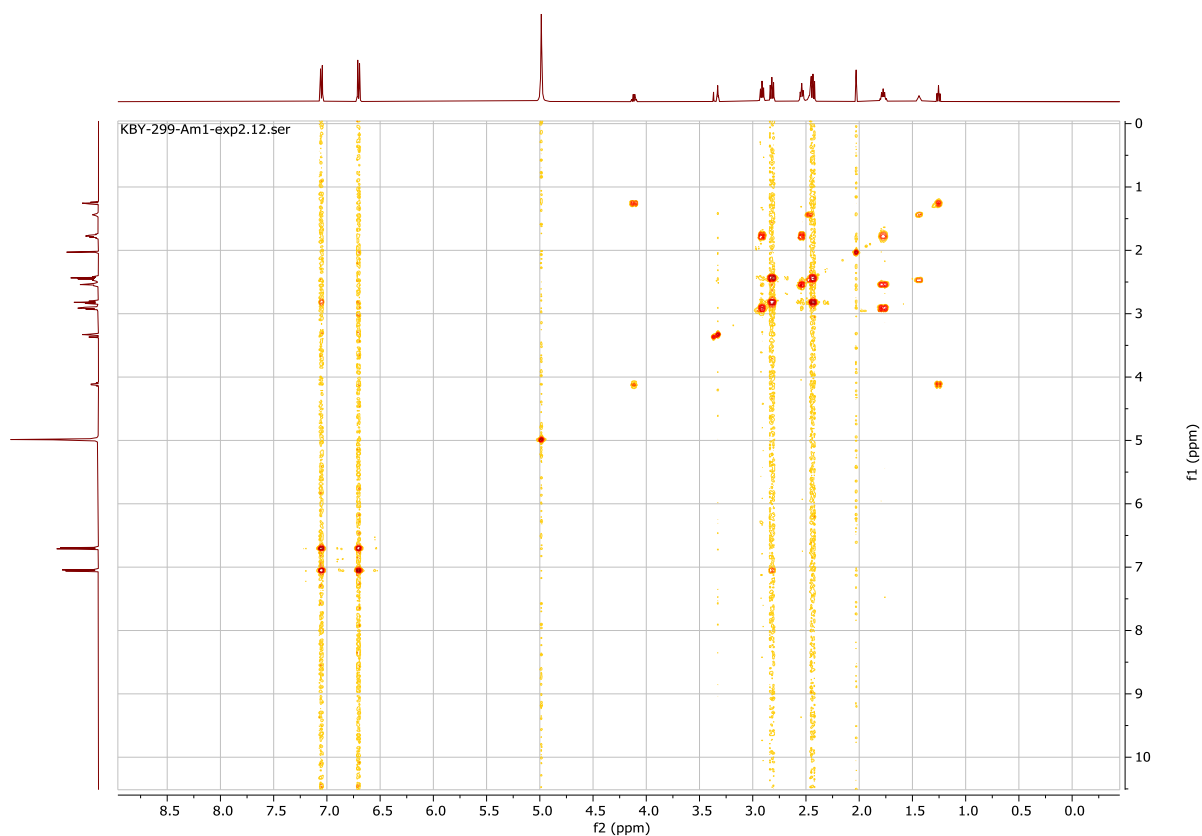

Figure S4 : HSQC NMR of PPI-1-PhA in CD<sub>3</sub>OD

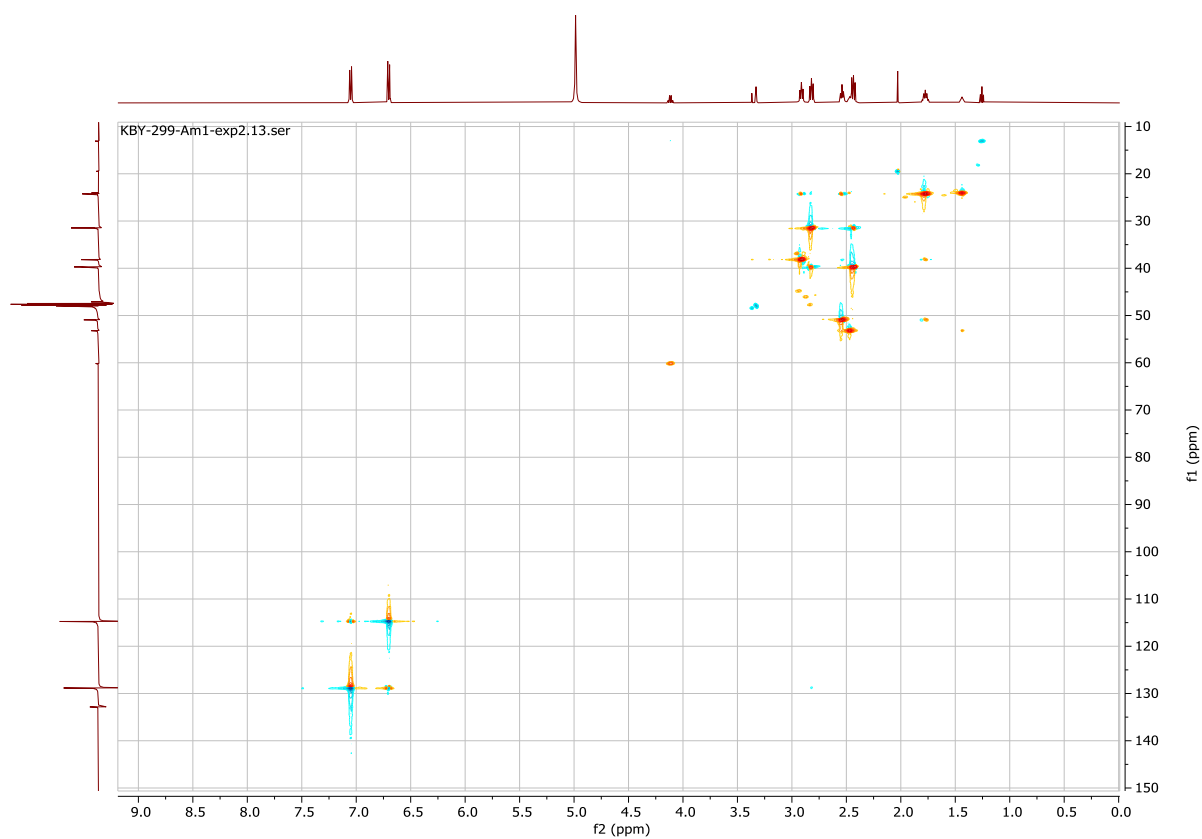

Figure S5: HMBC NMR of PPI-1-PhA in CD<sub>3</sub>OD

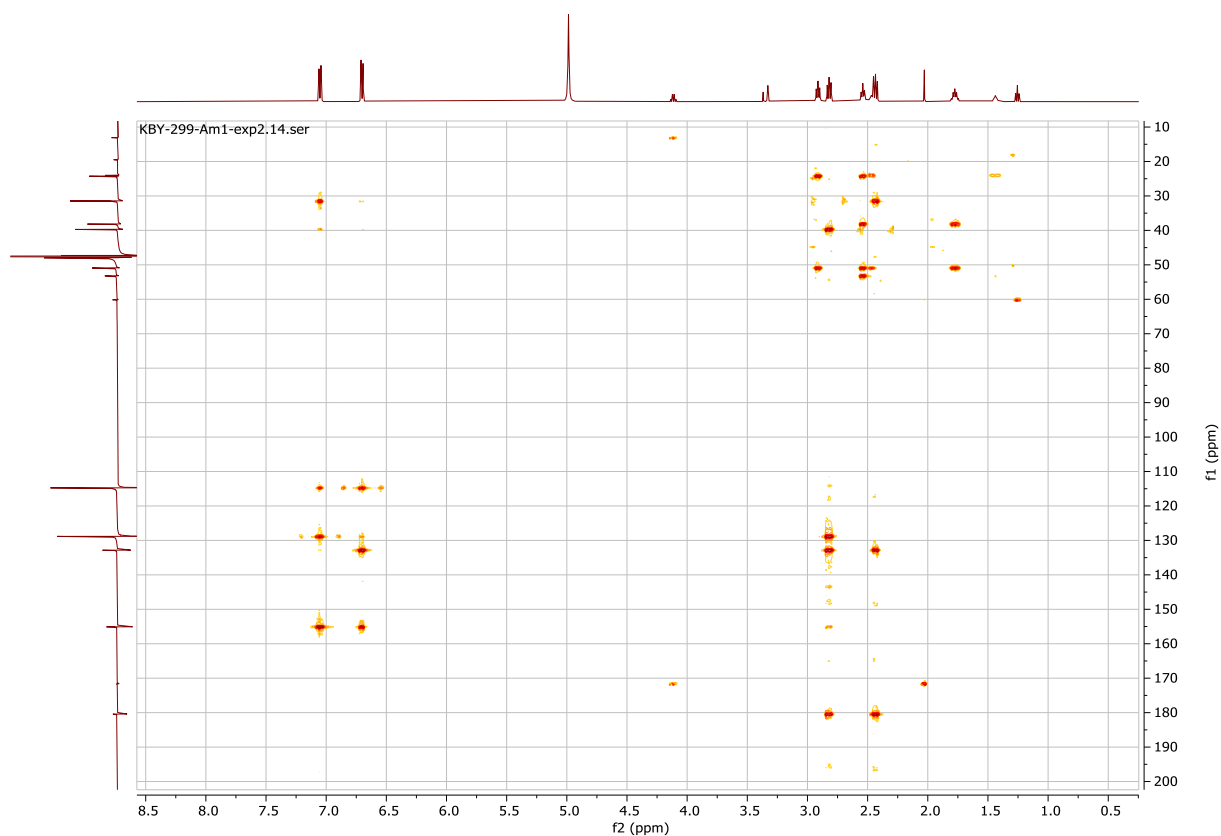

Figure S6: <sup>1</sup>H NMR of PPI-2-PhA in CD<sub>3</sub>OD

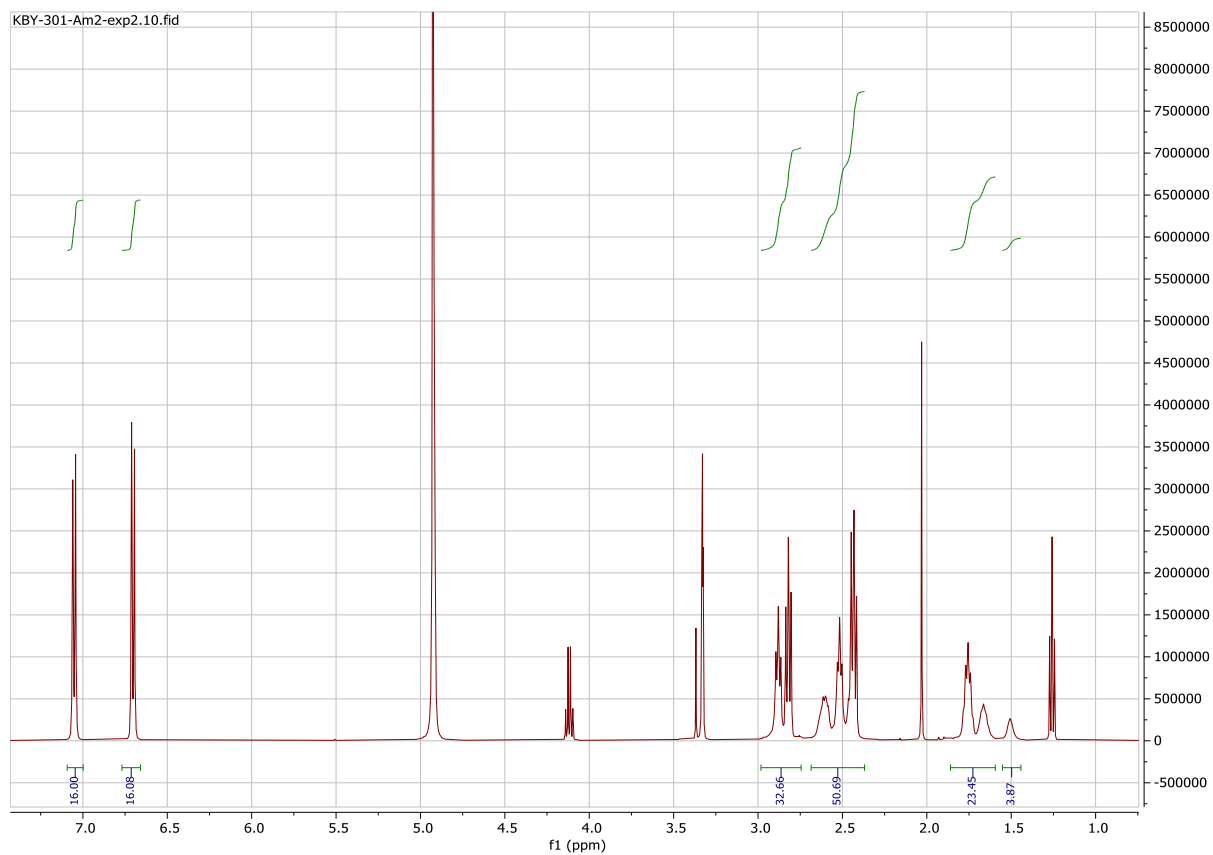

Figure S7:  $^{13}\text{C}$  NMR of PPI-2-PhA in  $\text{CD}_3\text{OD}$

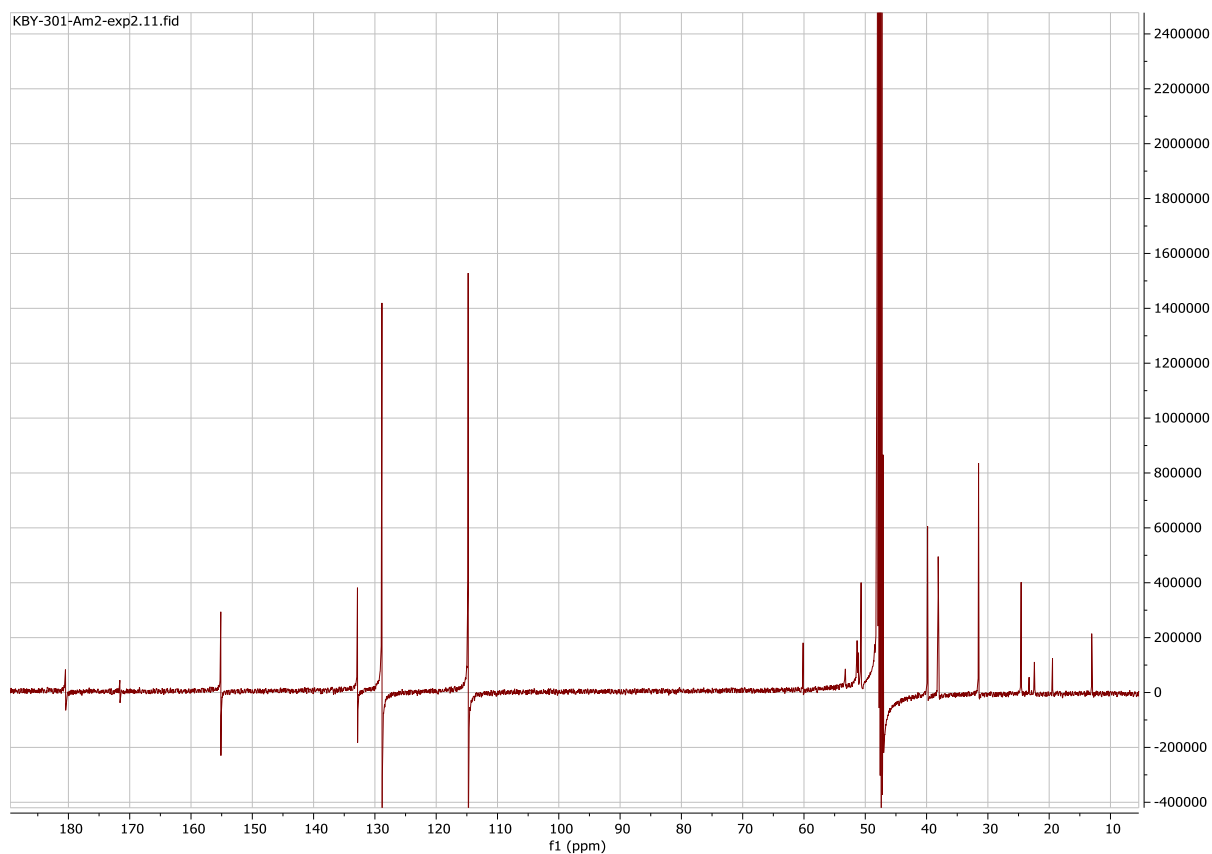

Figure S8:  $^1\text{H}$  NMR of PPI-3-PhA in  $\text{CD}_3\text{OD}$

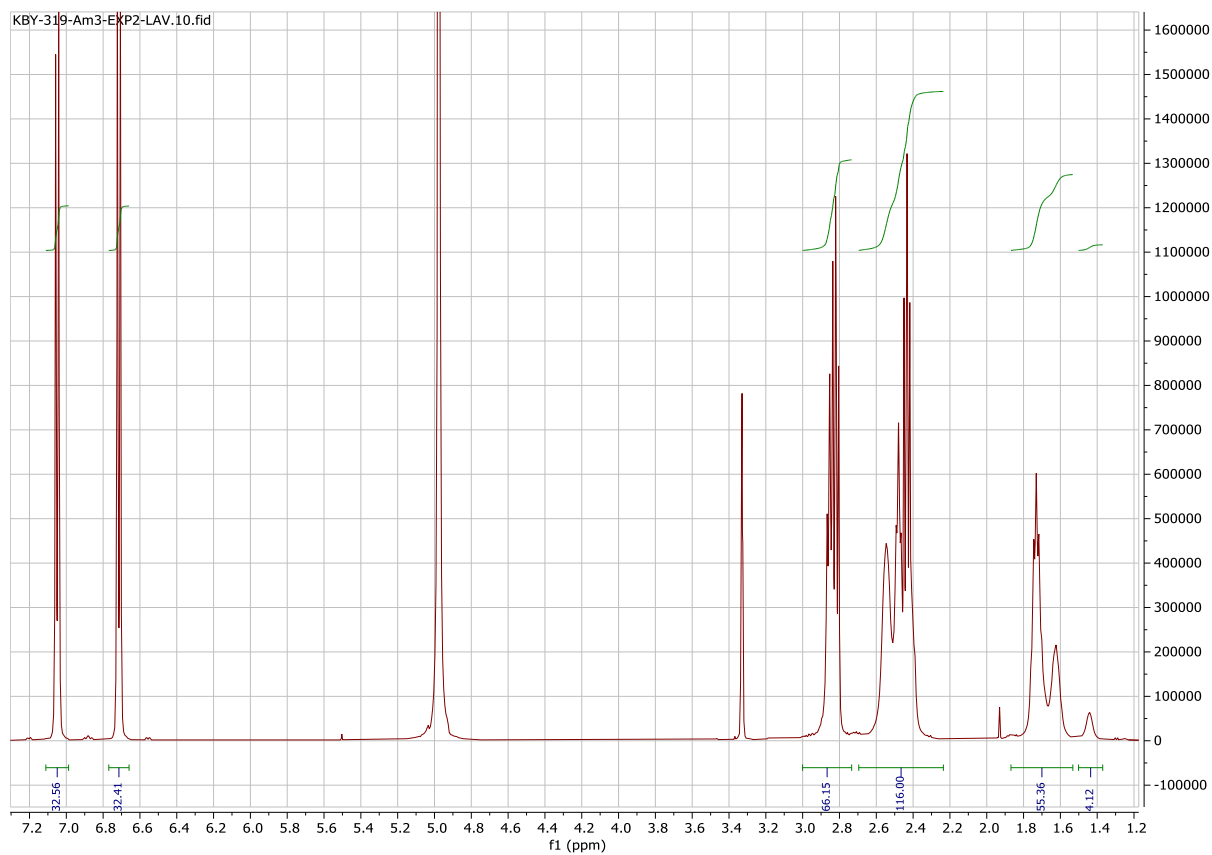

Figure S9:  $^1\text{H}$  NMR of PPI-1-FA in  $\text{CD}_3\text{OD}$

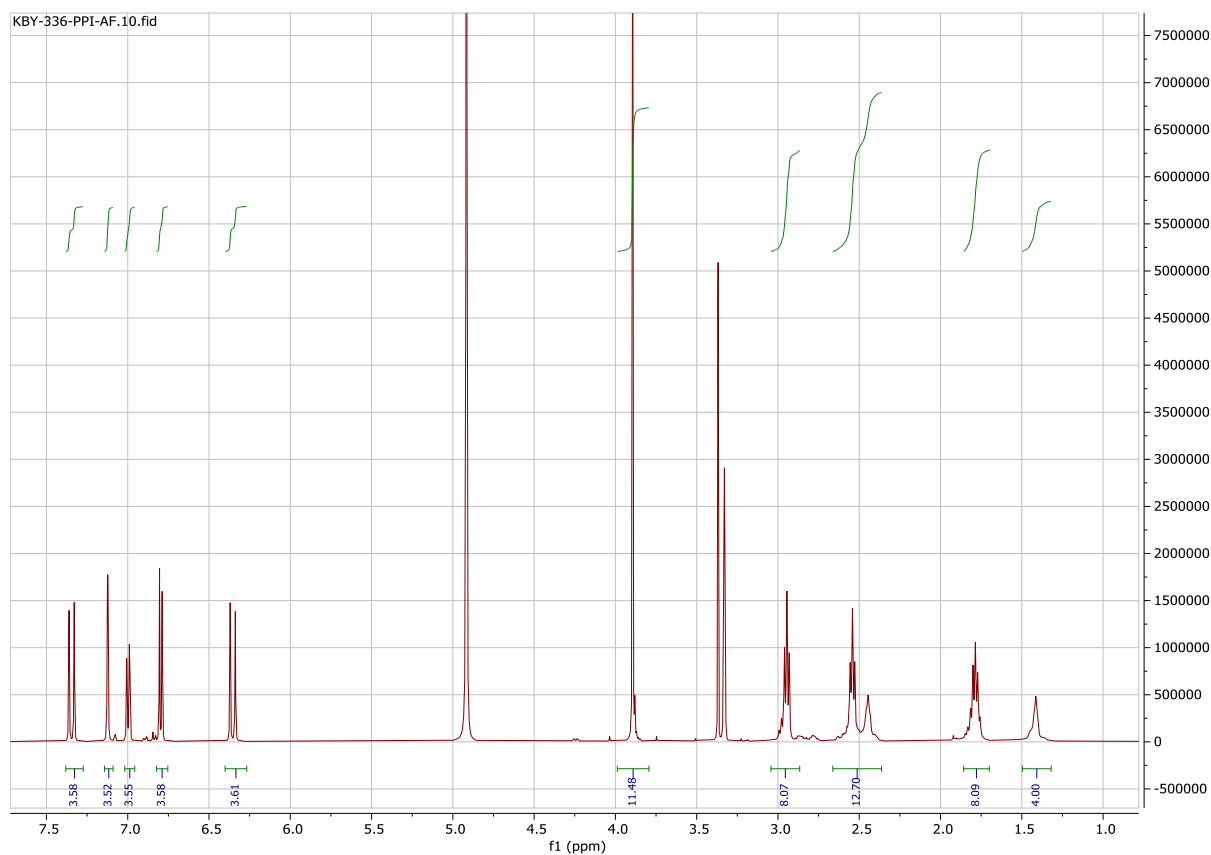

Figure S10:  $^{13}\text{C}$  NMR of PPI-1-FA in  $\text{CD}_3\text{OD}$

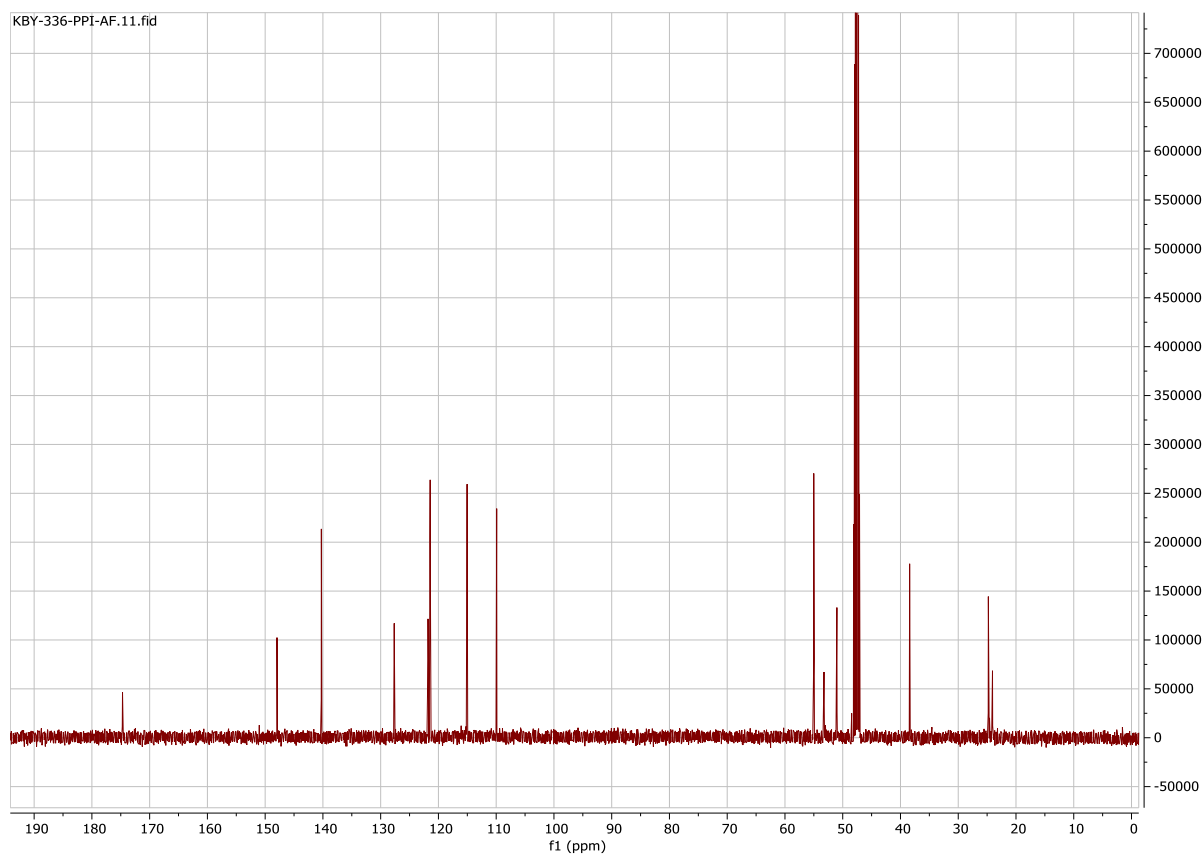

**Figure S11: COSY NMR of PPI-1-FA in CD<sub>3</sub>OD**

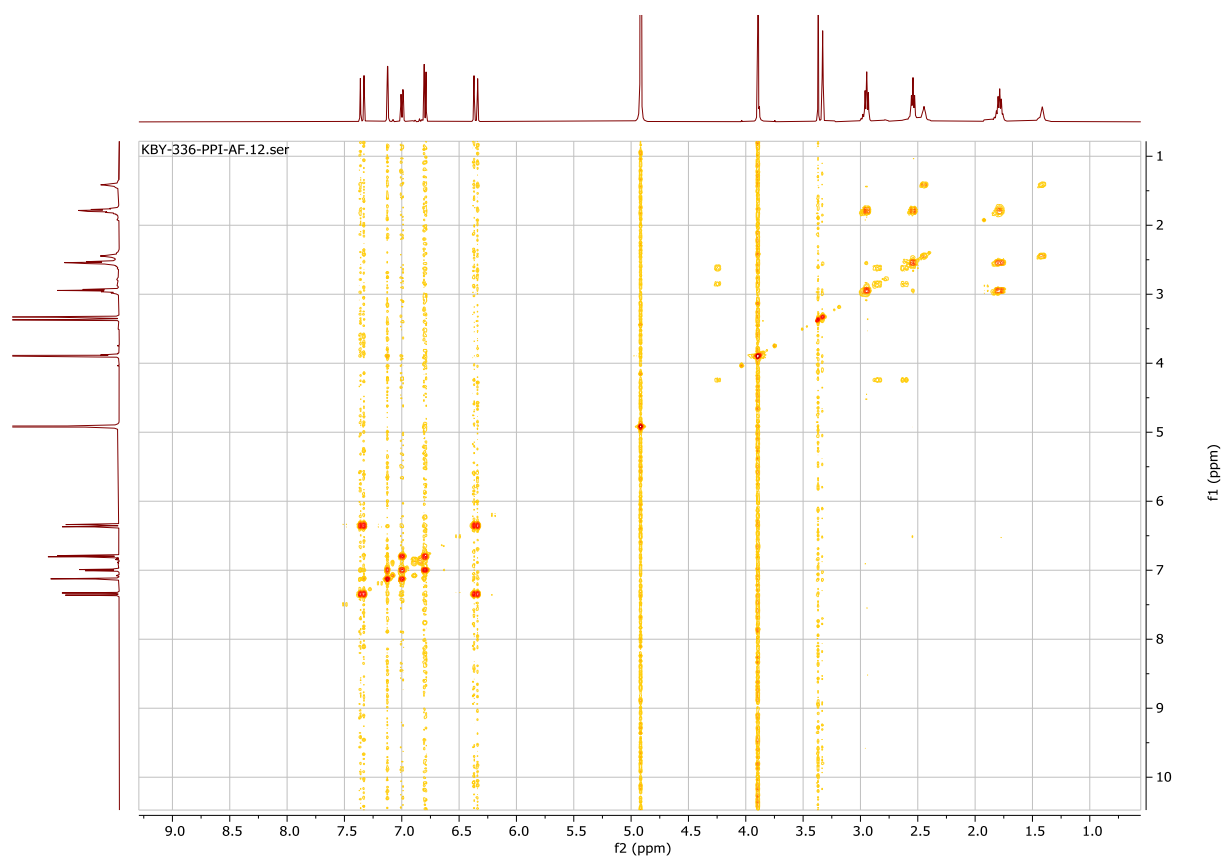

**Figure S12: HSQC NMR of PPI-1-FA in CD<sub>3</sub>OD**

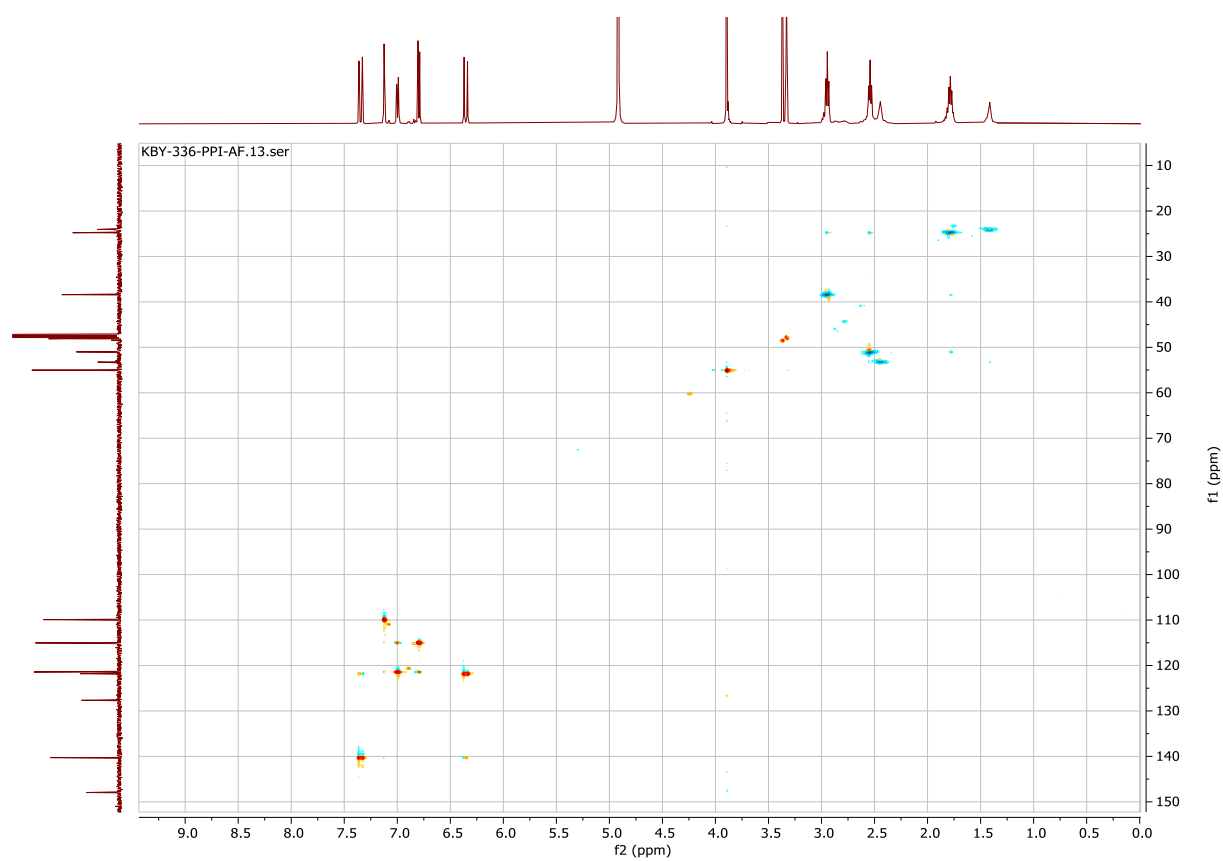

Figure S13: HMBC NMR of PPI-1-FA in CD<sub>3</sub>OD

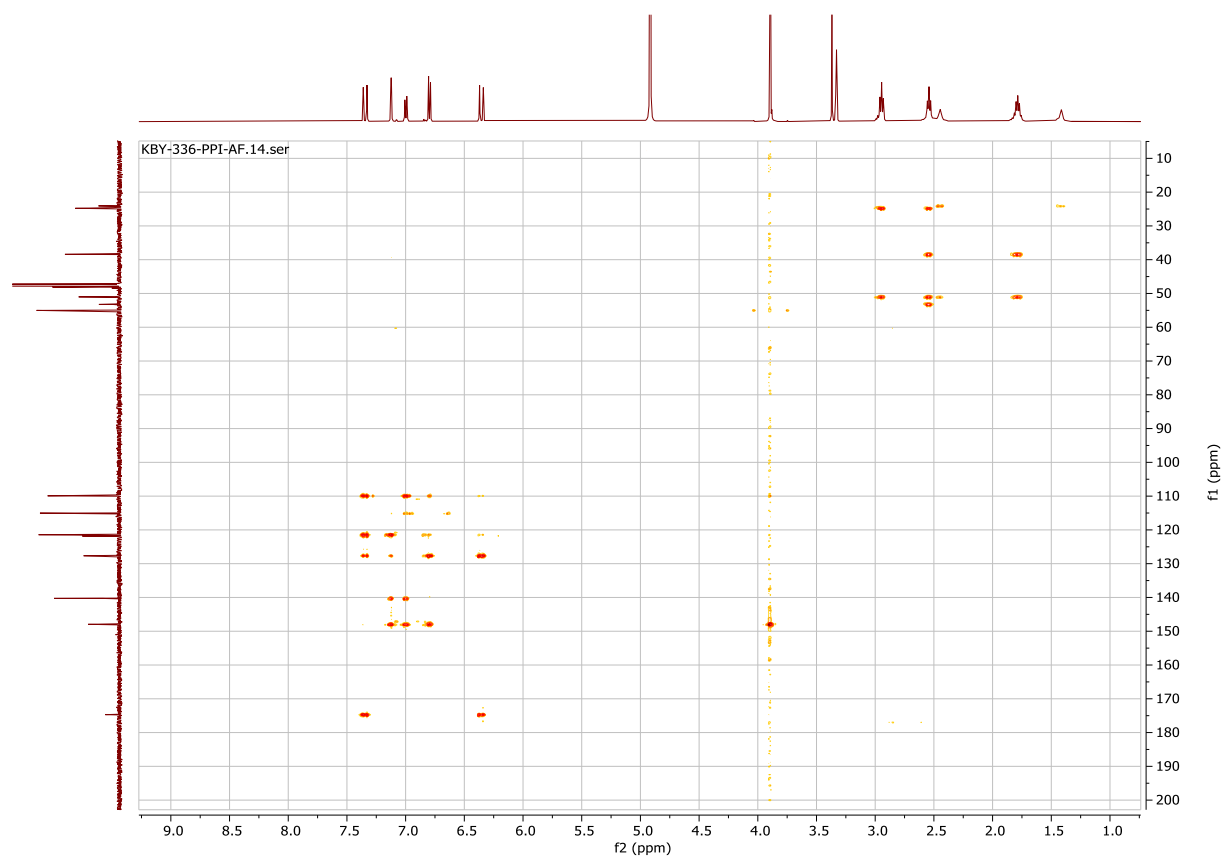

Figure S14: <sup>1</sup>H NMR of PPI-2-FA in CD<sub>3</sub>OD

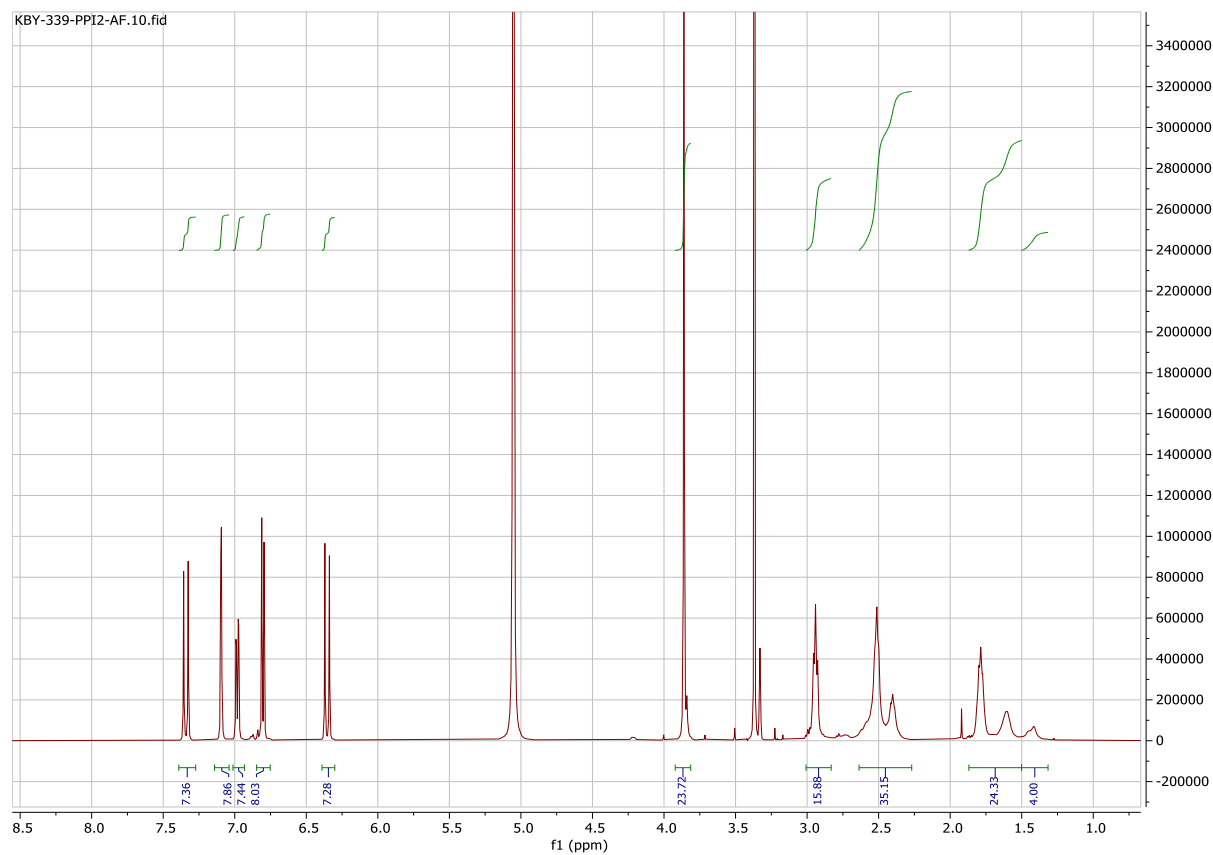

Figure S15:  $^{13}\text{C}$  NMR of PPI-2-FA in  $\text{CD}_3\text{OD}$

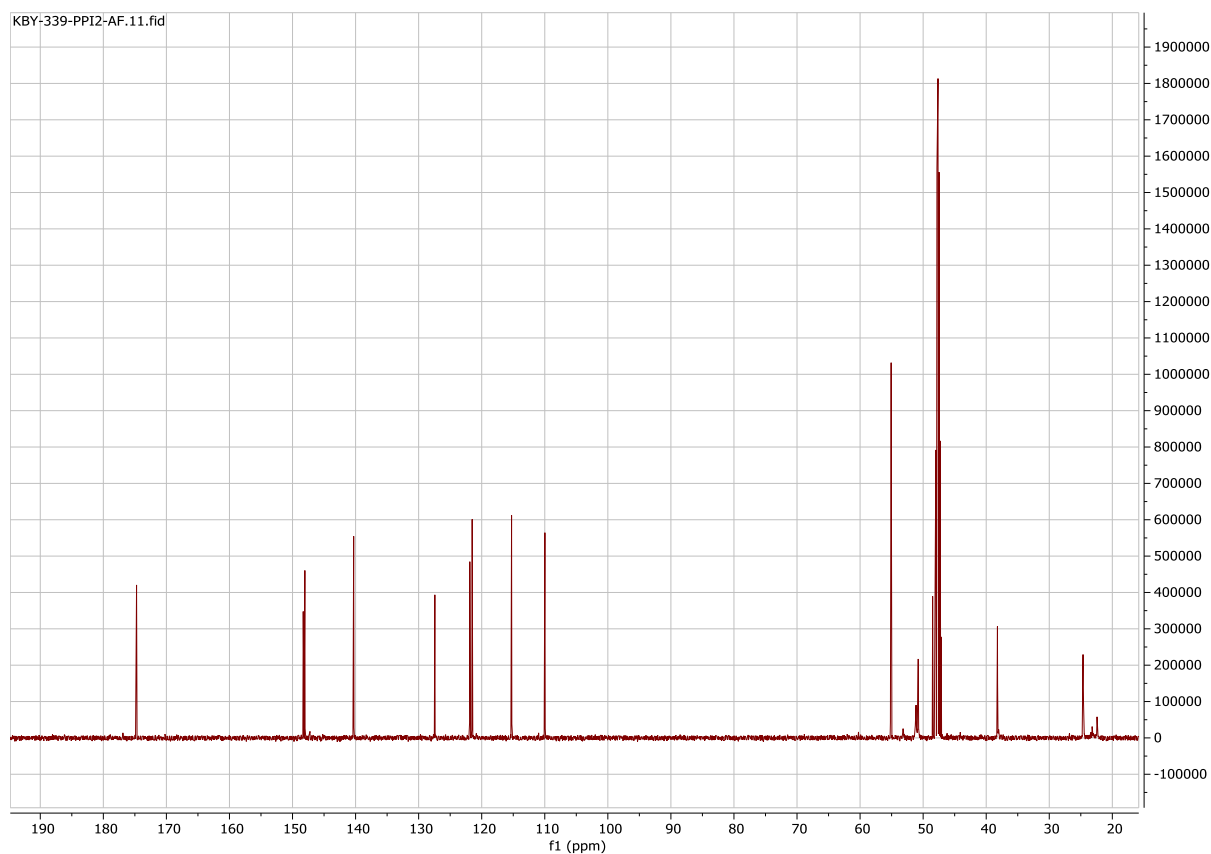

Figure S16:  $^1\text{H}$  NMR of PPI-3-FA in  $\text{CD}_3\text{OD}$

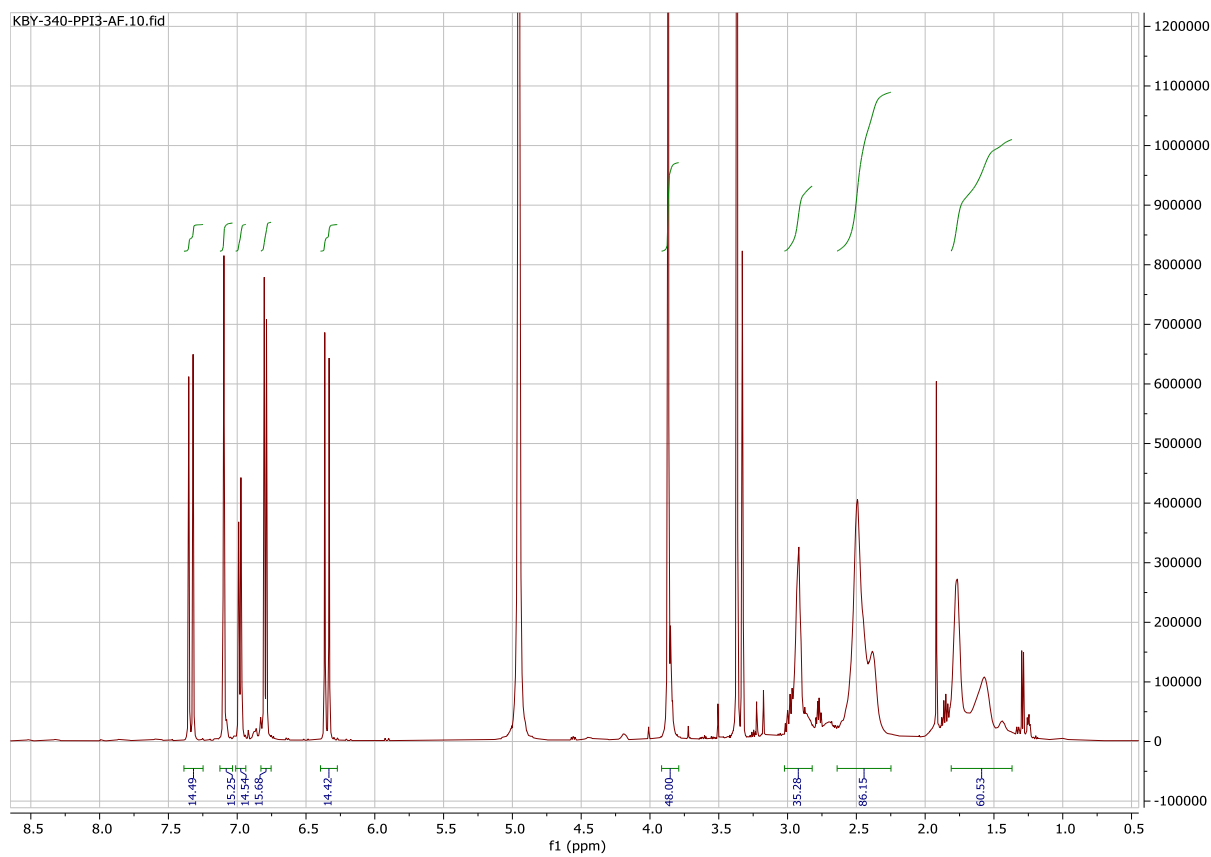



Figure S17:  $^{13}\text{C}$  NMR of PPI-3-FA in  $\text{CD}_3\text{OD}$

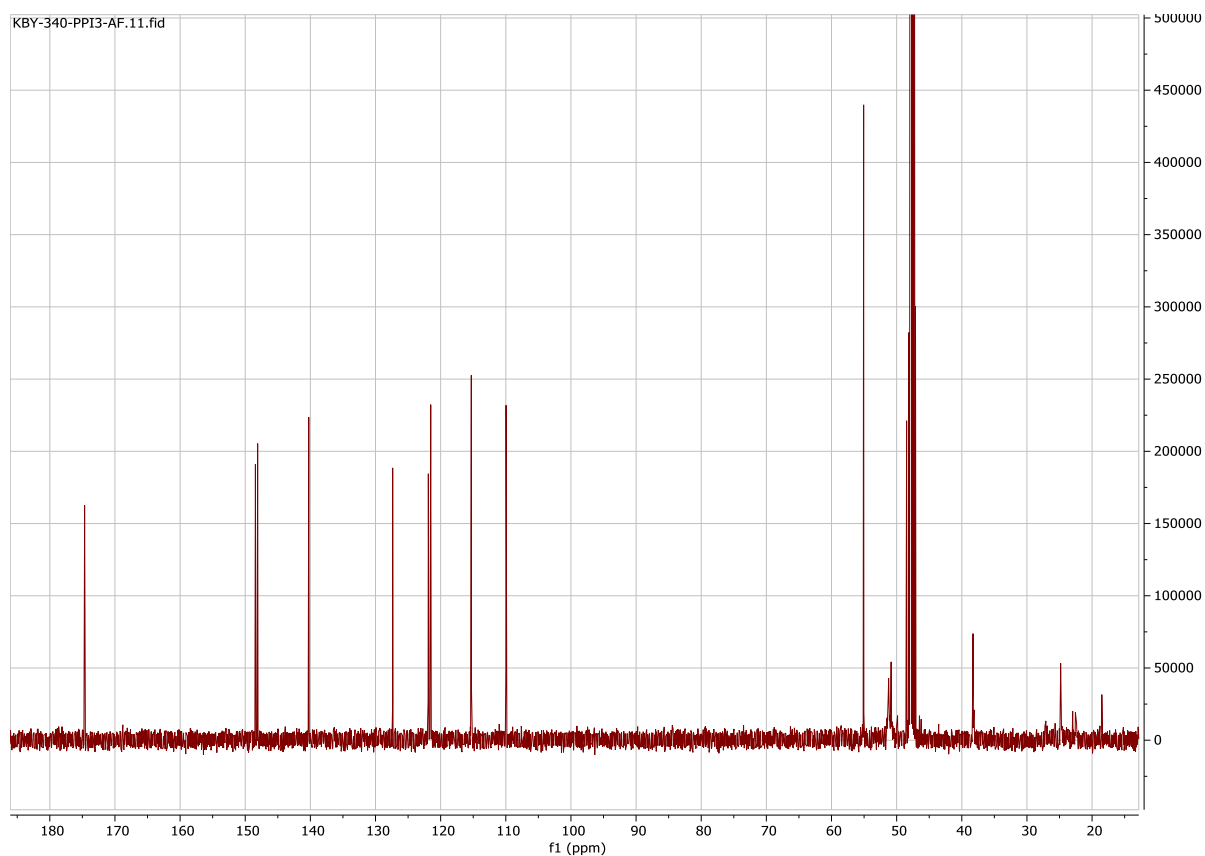

Figure S18: IR of PPI-3-FA

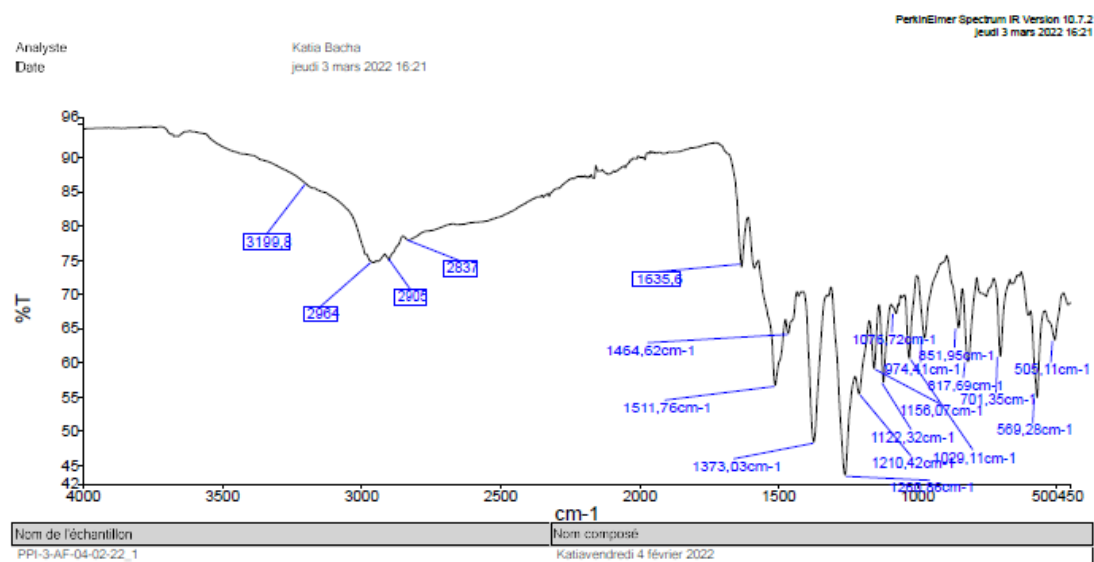

Figure S19:  $^1\text{H}$  NMR of PPI-1-CA in  $(\text{CD}_3)_2\text{SO}$

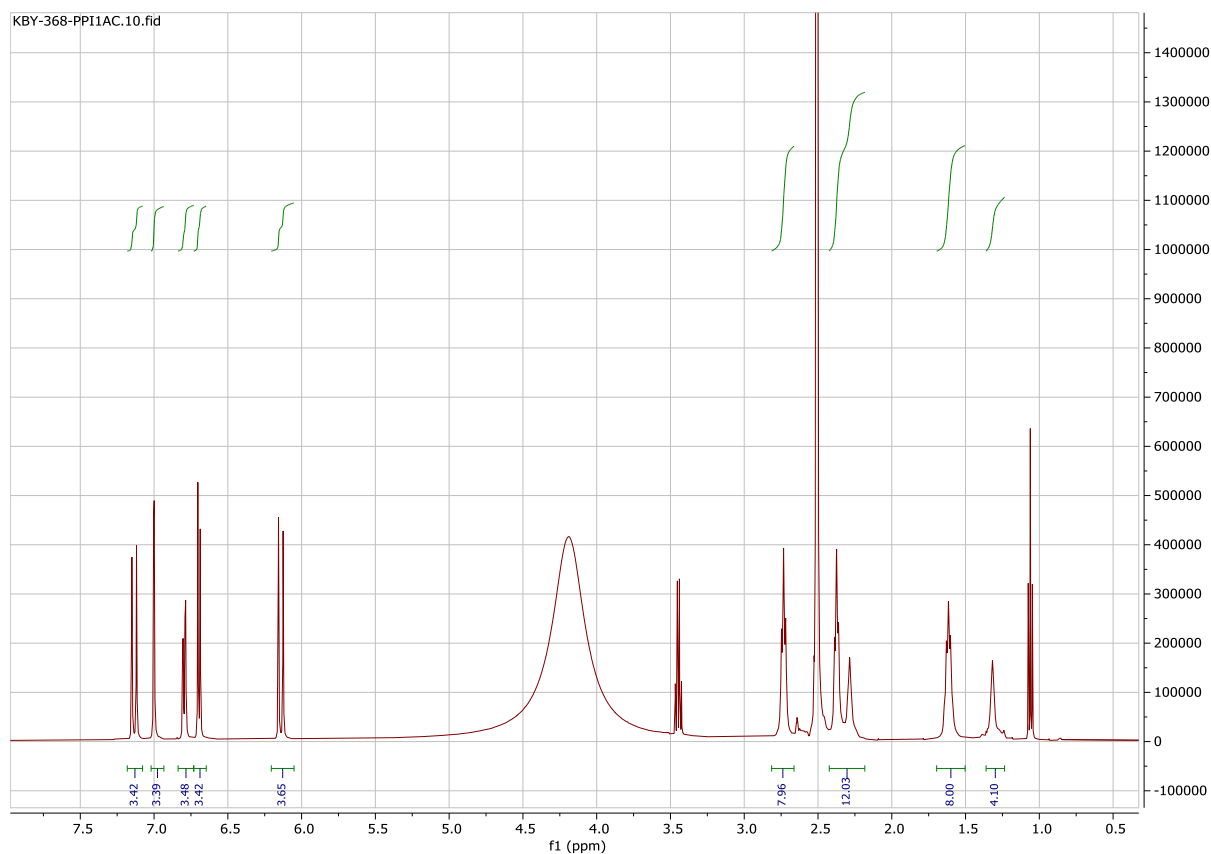

Figure S20:  $^{13}\text{C}$  NMR of PPI-1-CA in  $(\text{CD}_3)_2\text{SO}$

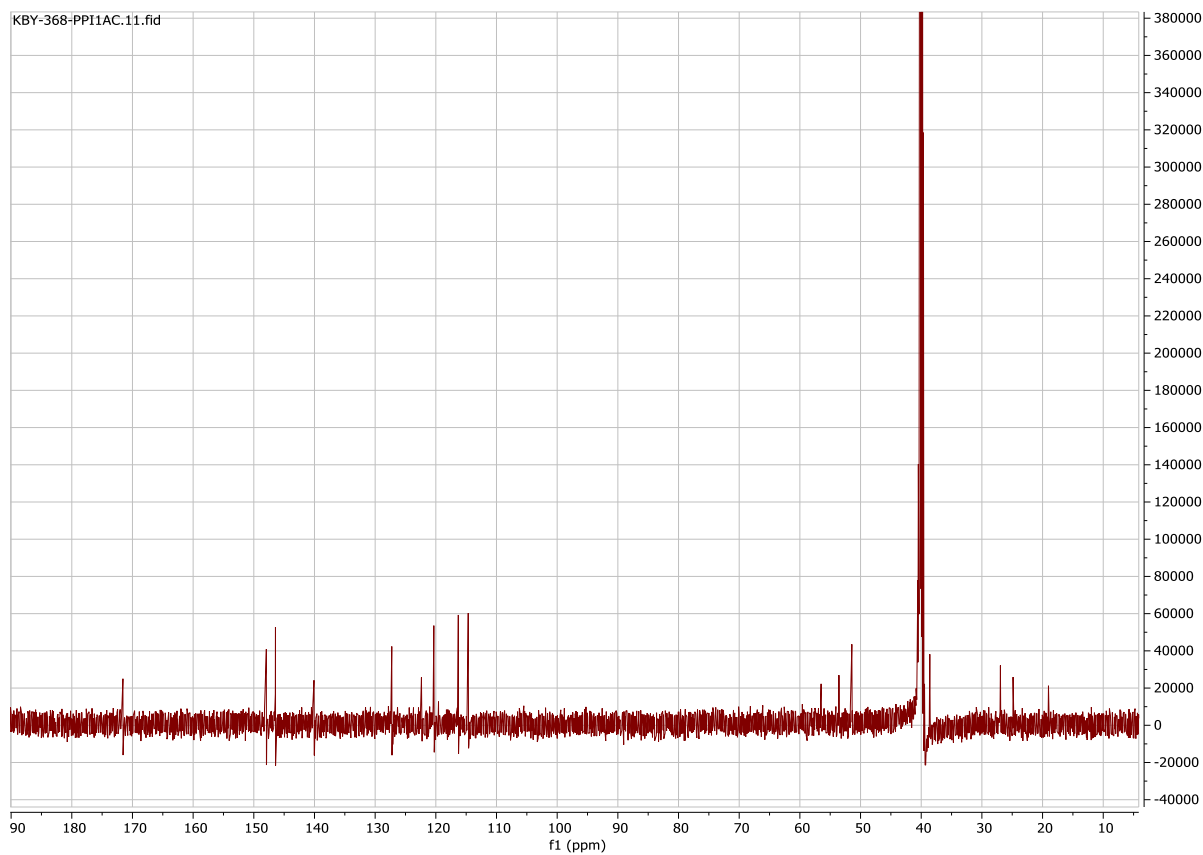

Figure S21:  $^1\text{H}$  NMR of PPI-2-CA in  $(\text{CD}_3)_2\text{SO}$

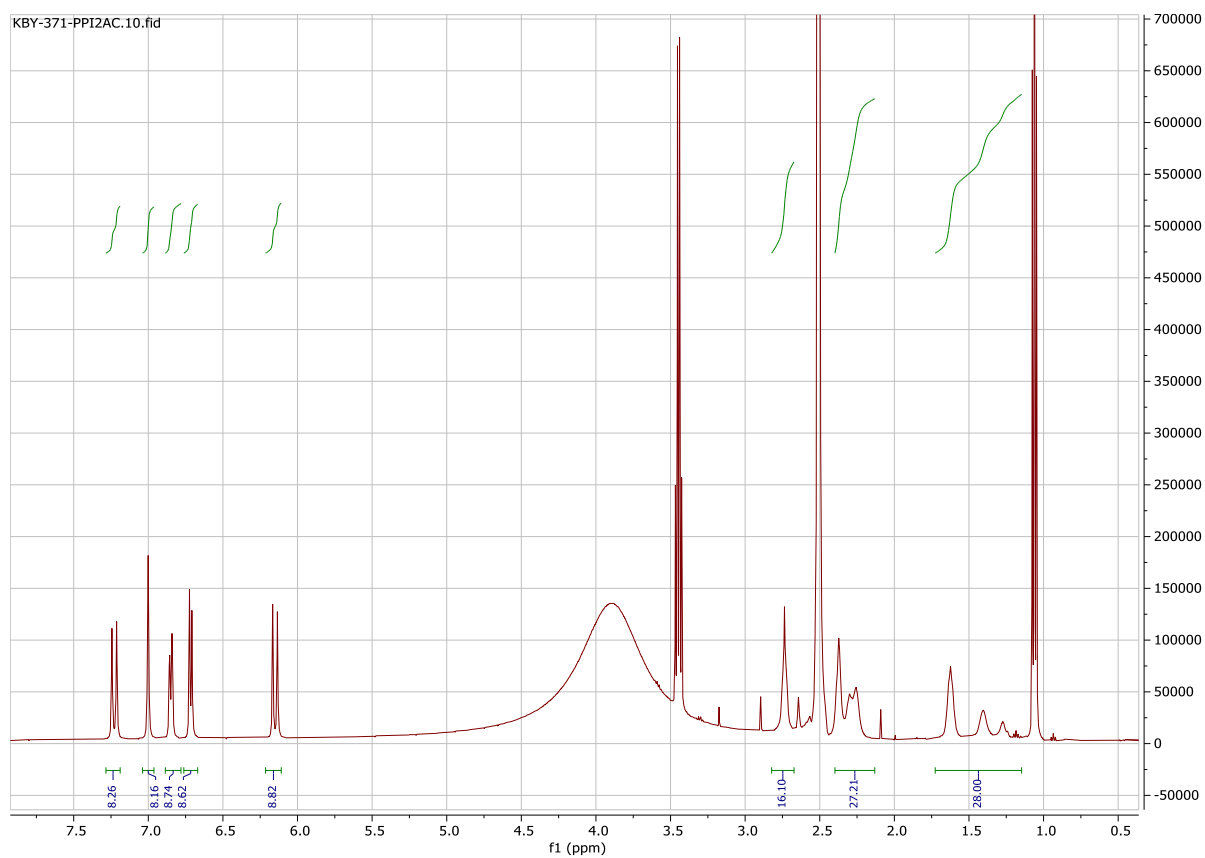

Figure S22:  $^{13}\text{C}$  NMR of PPI-2-CA in  $(\text{CD}_3)_2\text{SO}$

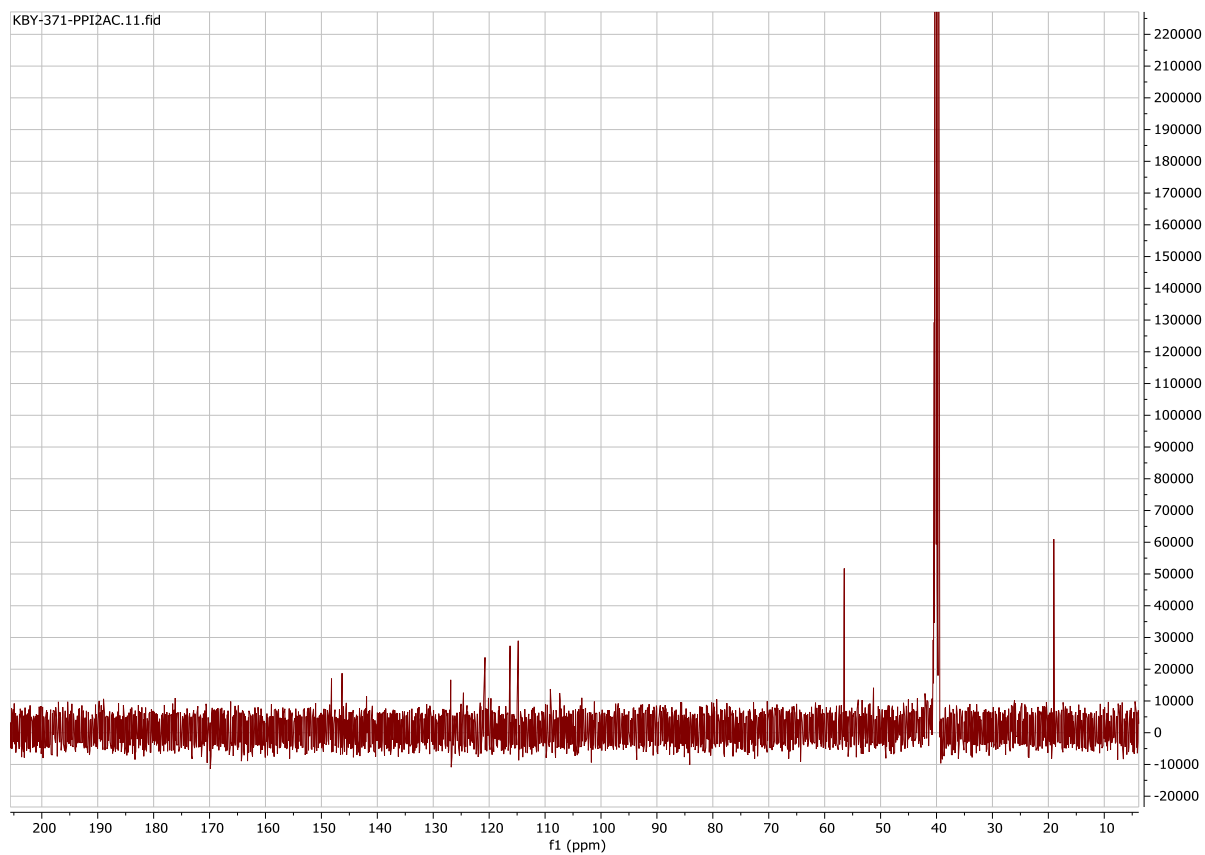

**Figure S23:  $^1\text{H}$  NMR of PPI-3-CA in  $(\text{CD}_3)_2\text{SO}$  (weak solubility)**

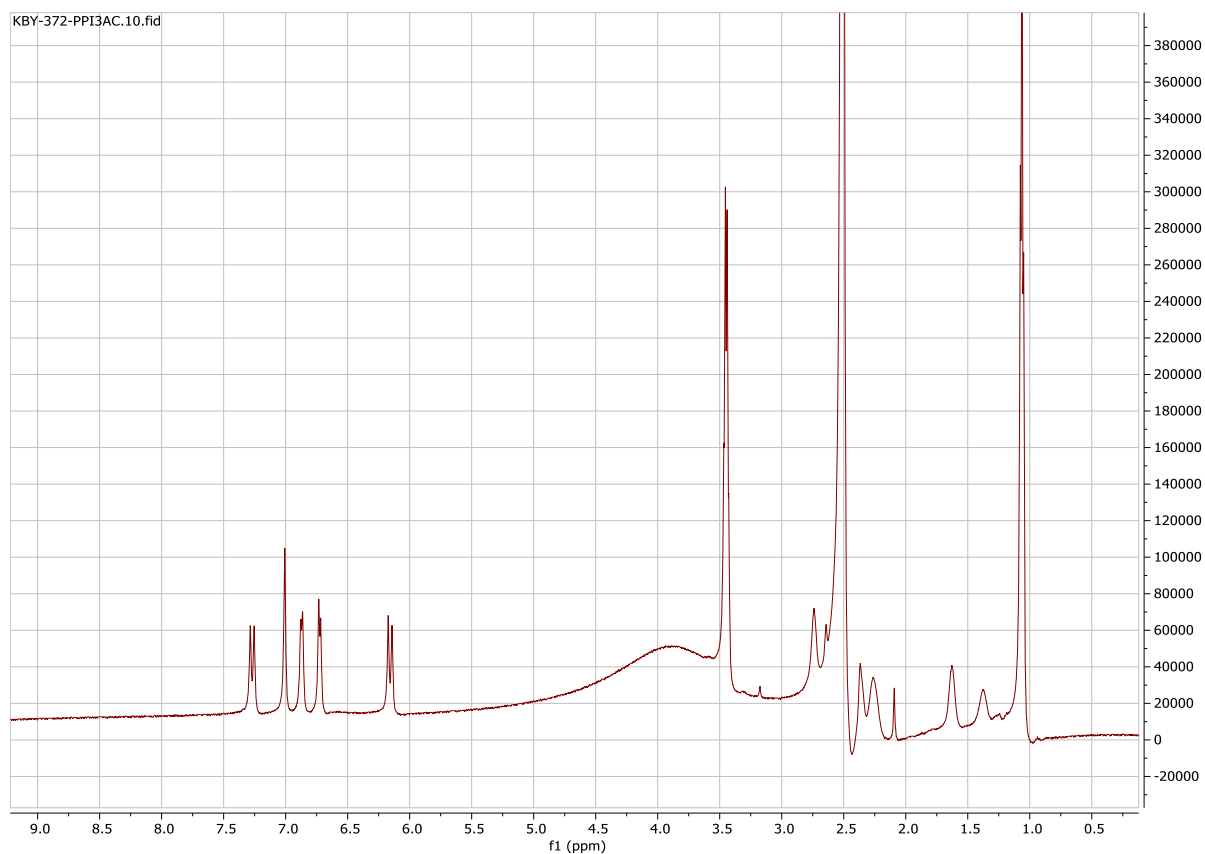

**Figure S24:  $^{13}\text{C}$  NMR de PPI-3-CA in  $(\text{CD}_3)_2\text{SO}$  (weak solubility)**

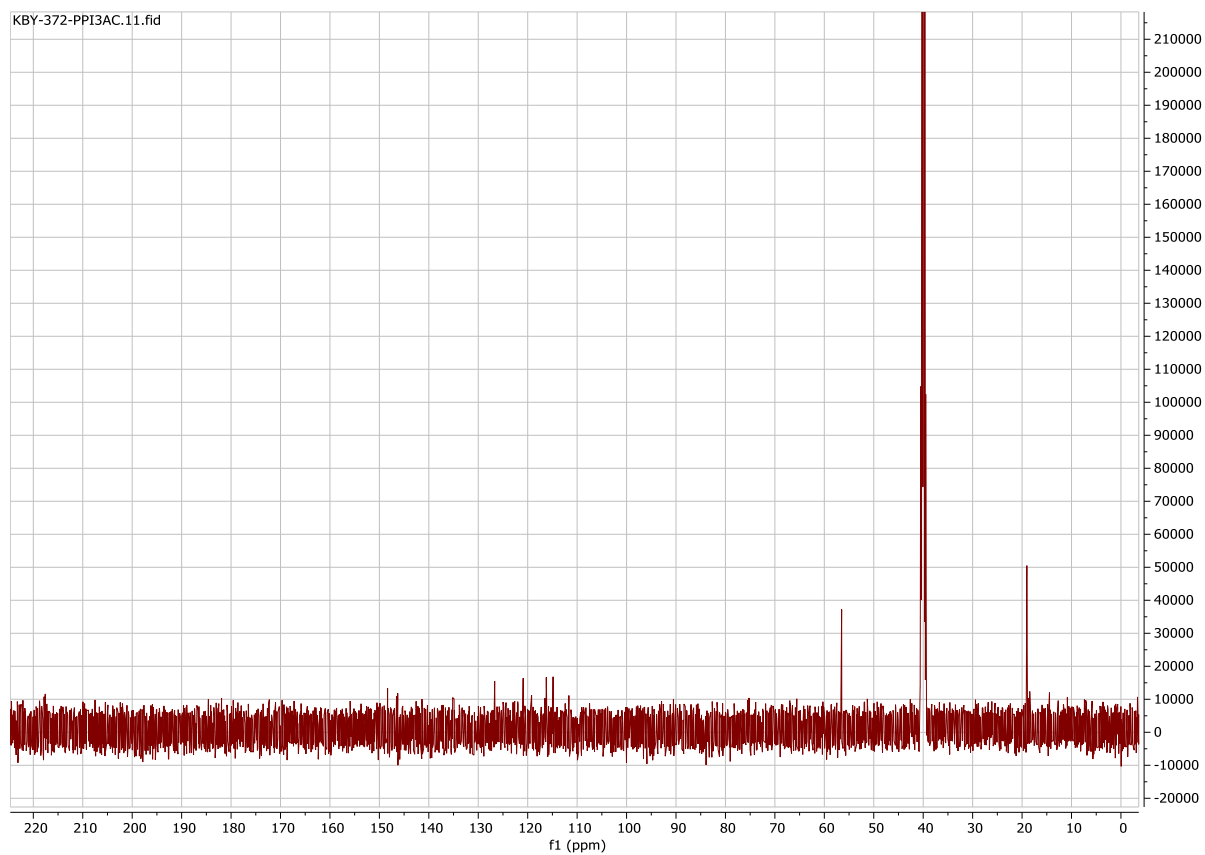

Figure S25: IR of PPI-3-CA

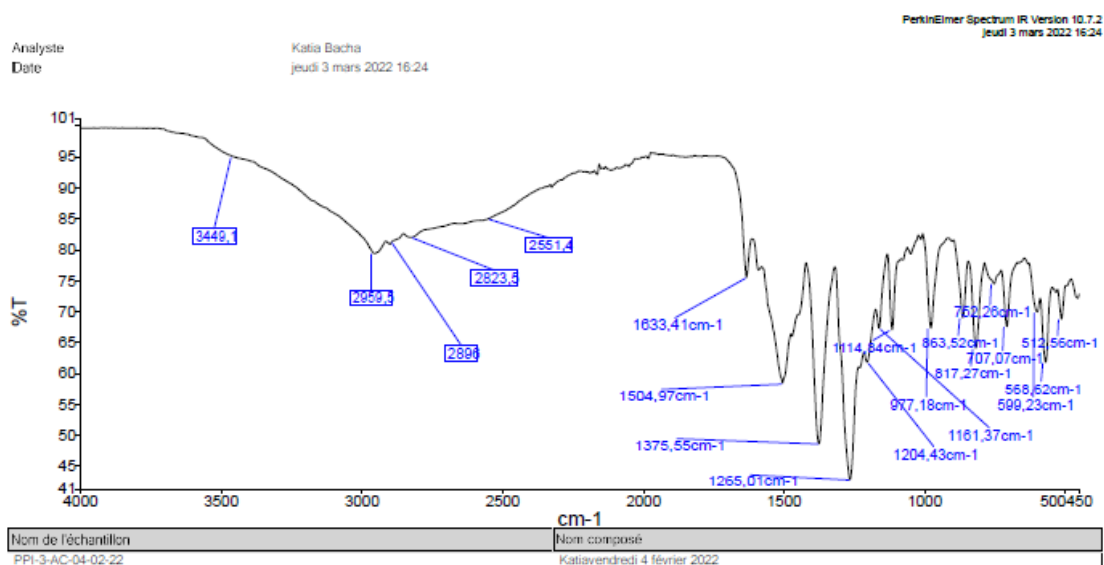

Figure S26: IR of Caffeic acid

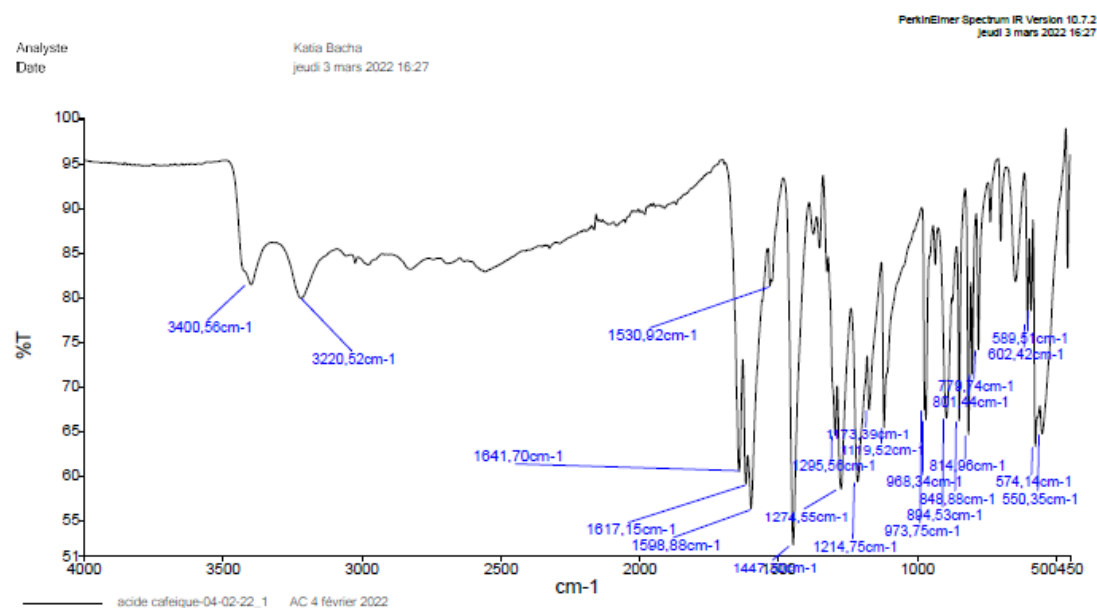

Figure S27:  $^1\text{H}$  NMR of PAMAM-1-PhA in  $\text{CD}_3\text{OD}$

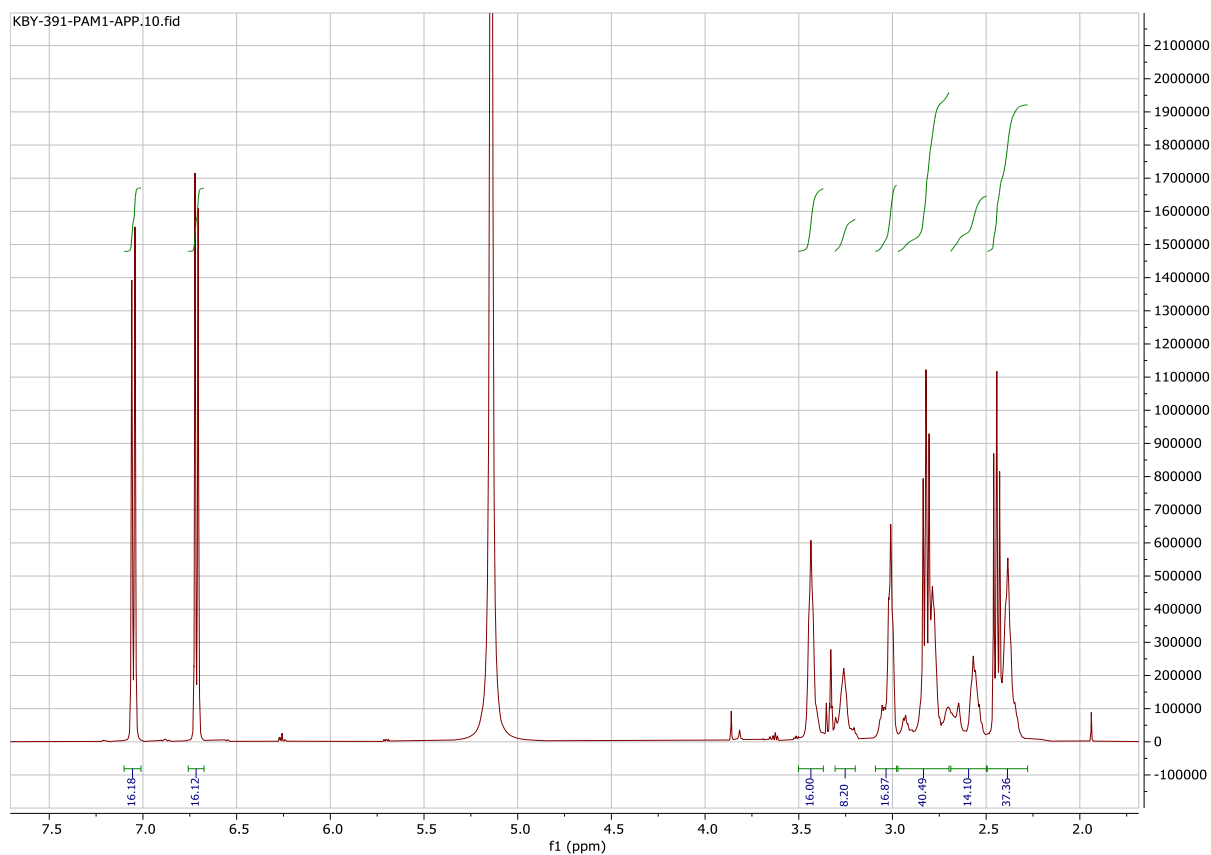

Figure S28:  $^{13}\text{C}$  NMR of PAMAM-1-PhA in  $\text{CD}_3\text{OD}$

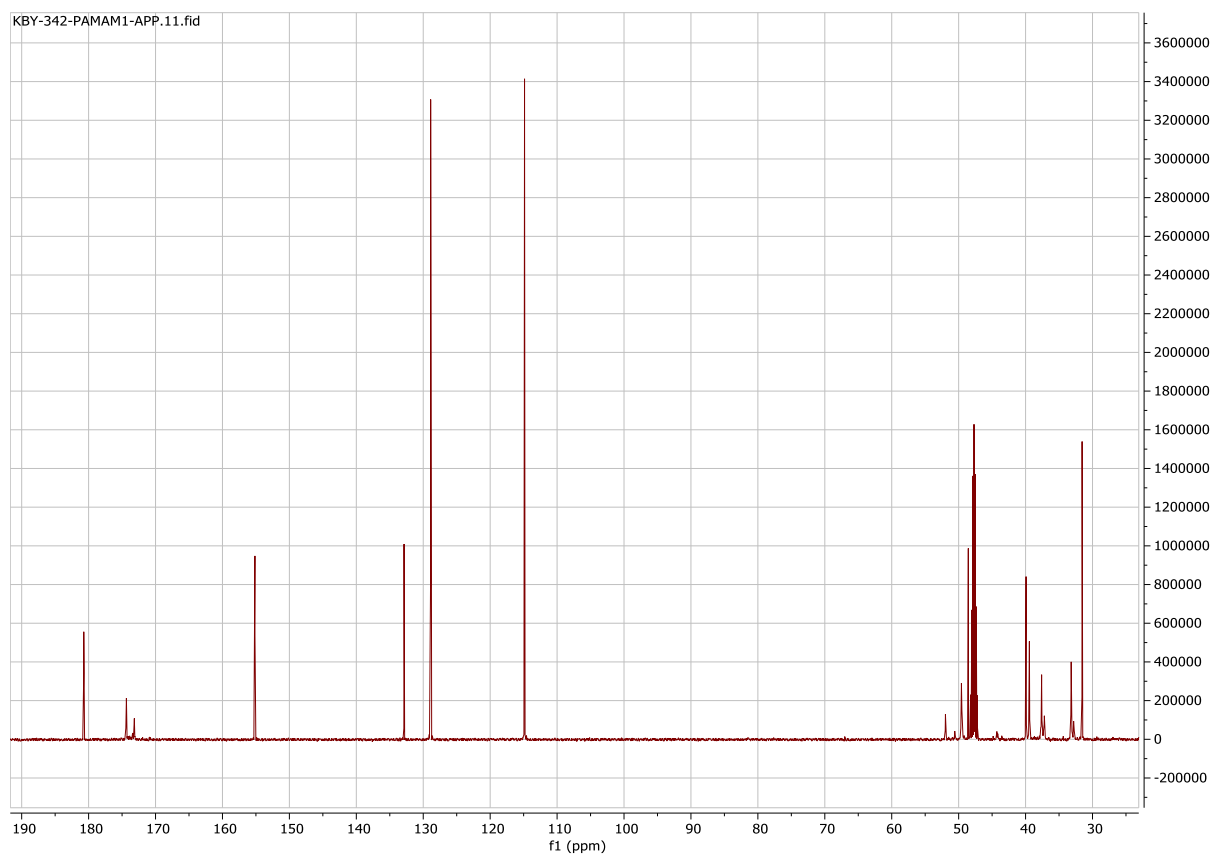

Figure S29: COSY NMR of PAMAM-1-PhA in CD<sub>3</sub>OD

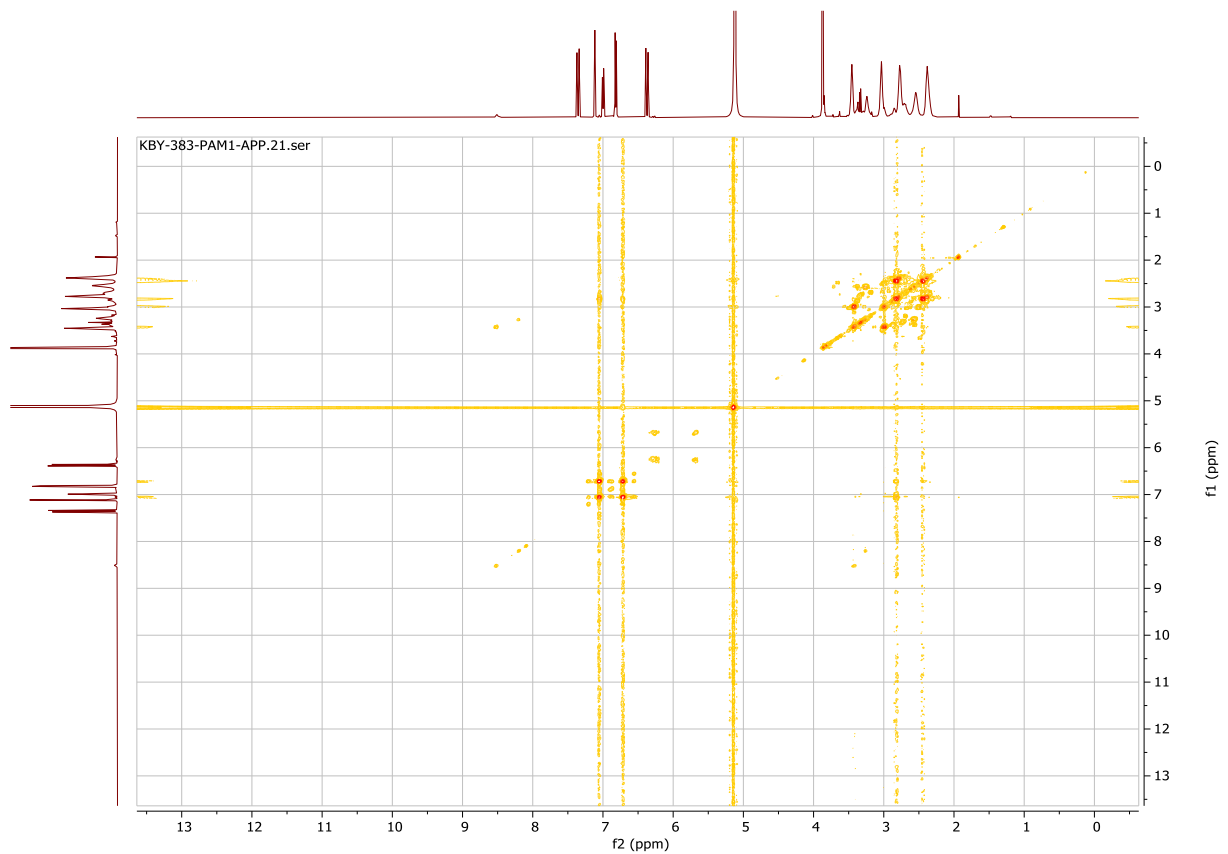

Figure S30: IR of PAMAM-1-PhA

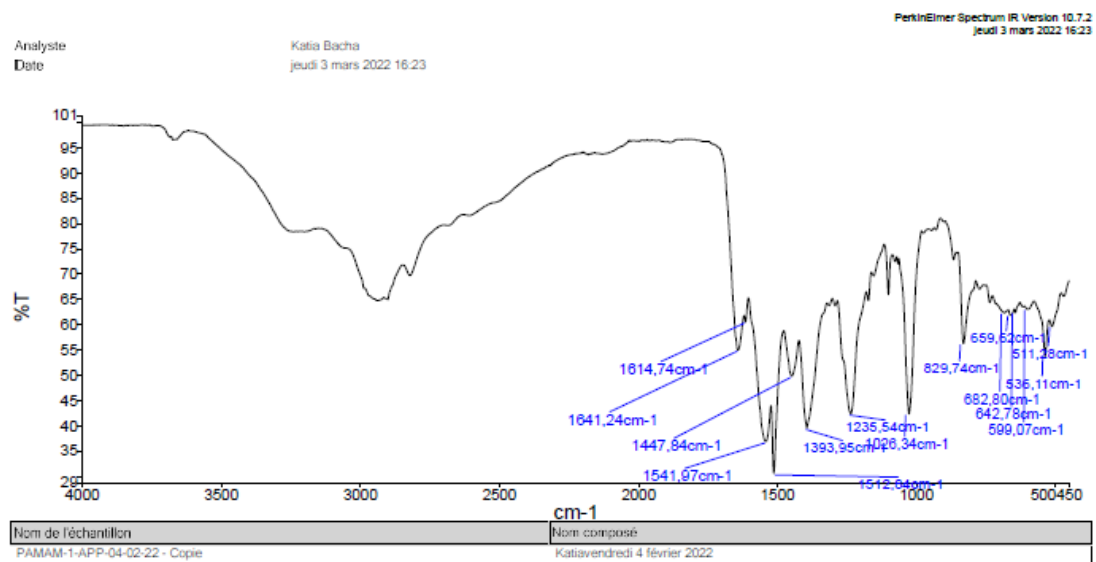

Figure S31: IR of Phloretic acid

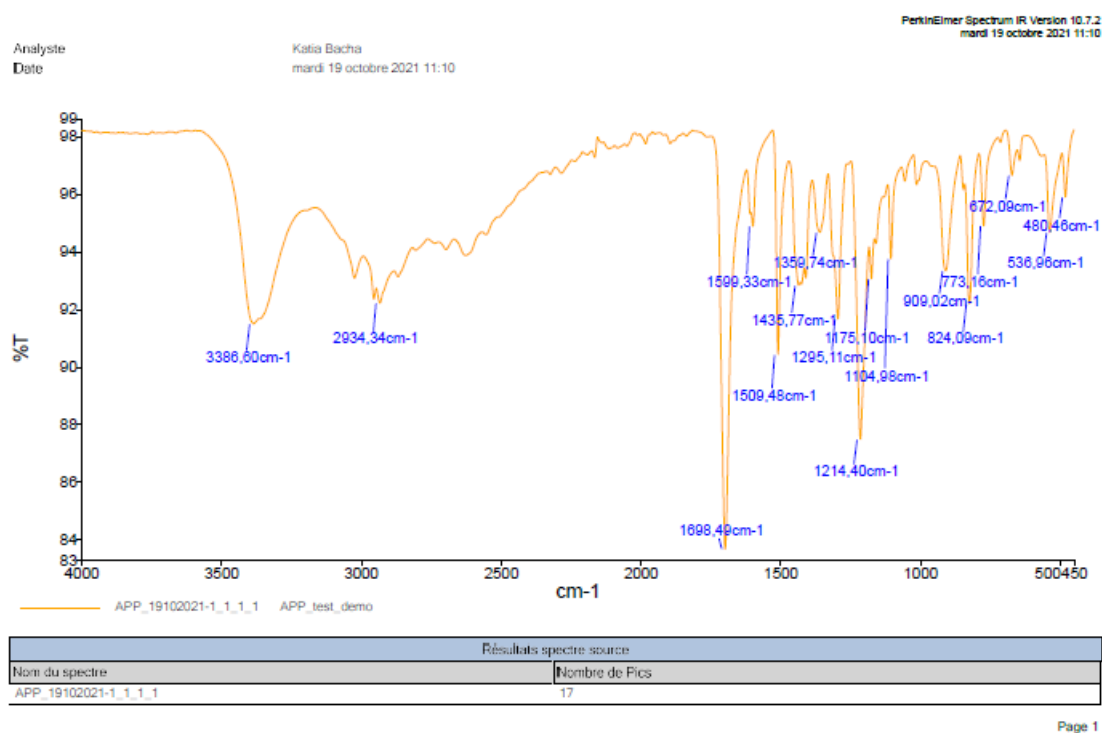

Figure S32:  $^1\text{H}$  NMR of PAMAM-2-PhA in  $\text{CD}_3\text{OD}$

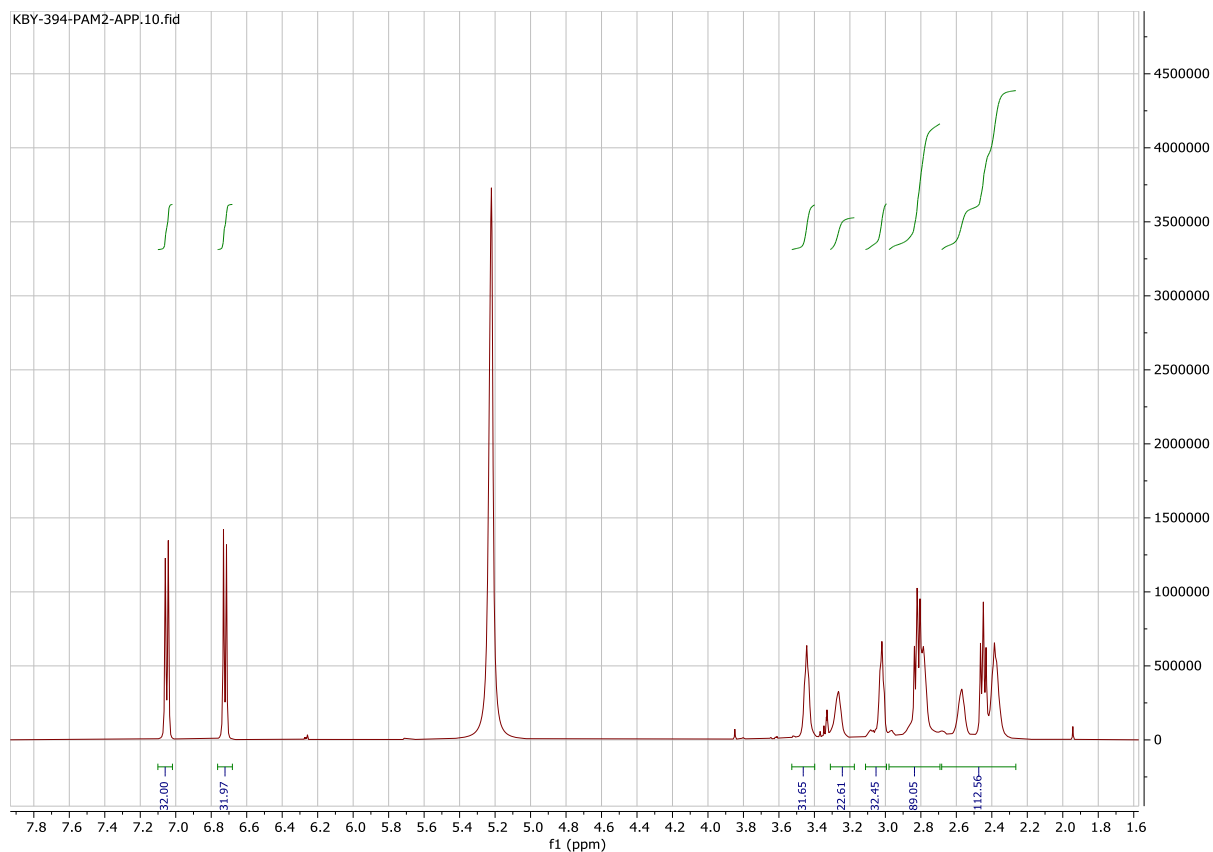



Figure S33: IR of PAMAM-2-PhA

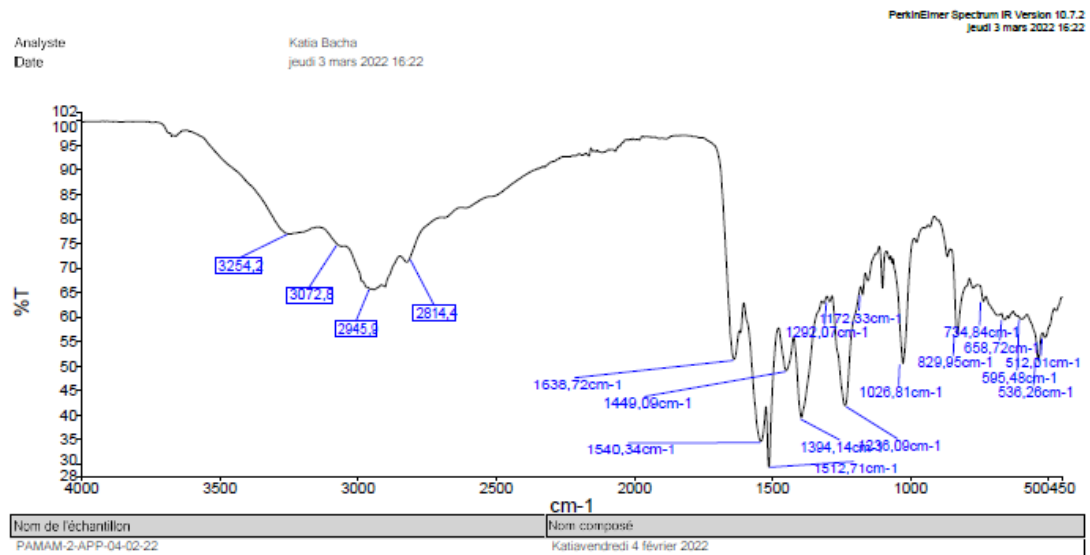

Figure S34: <sup>1</sup>H NMR of PAMAM-3-PhA in CD<sub>3</sub>OD

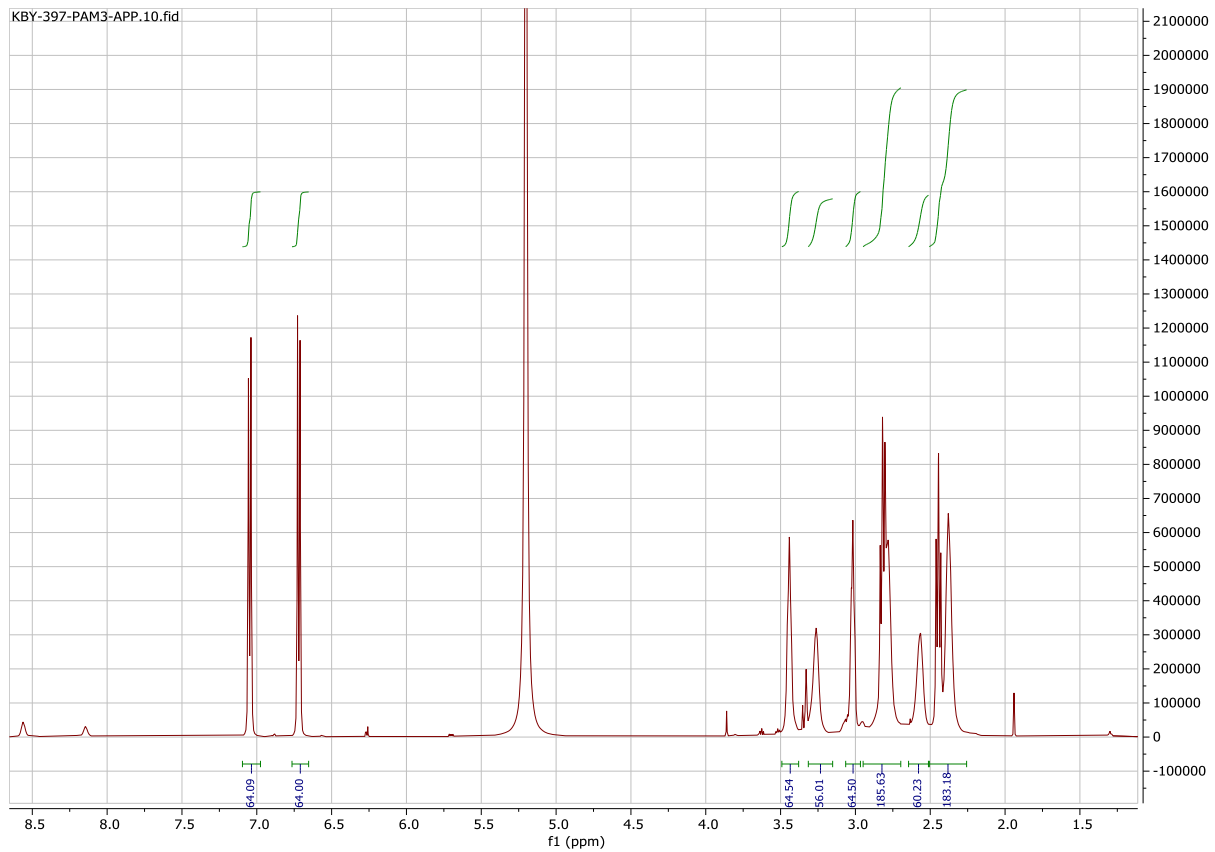

Figure S35:  $^{13}\text{C}$  NMR of PAMAM-3-PhA in  $\text{CD}_3\text{OD}$

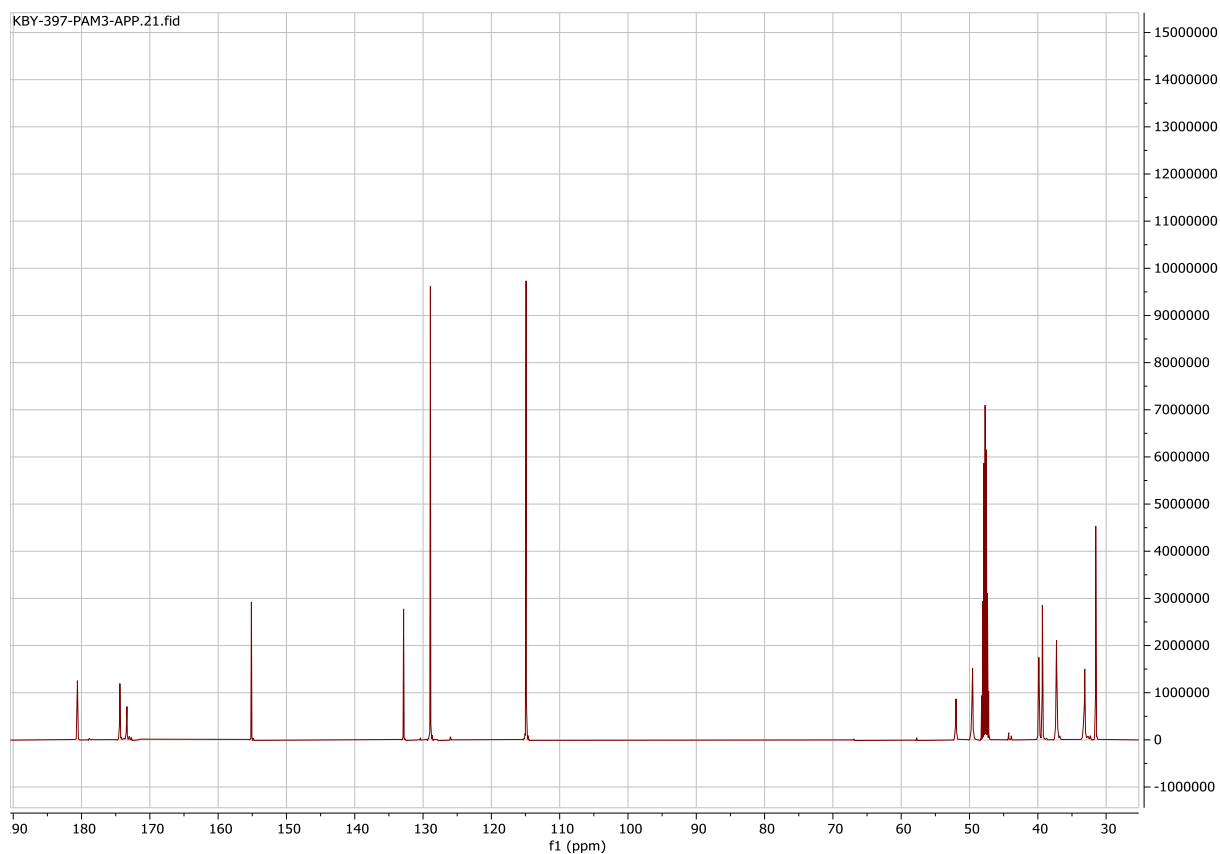

Figure S36: HMBC NMR of PAMAM-3-PhA in  $\text{CD}_3\text{OD}$

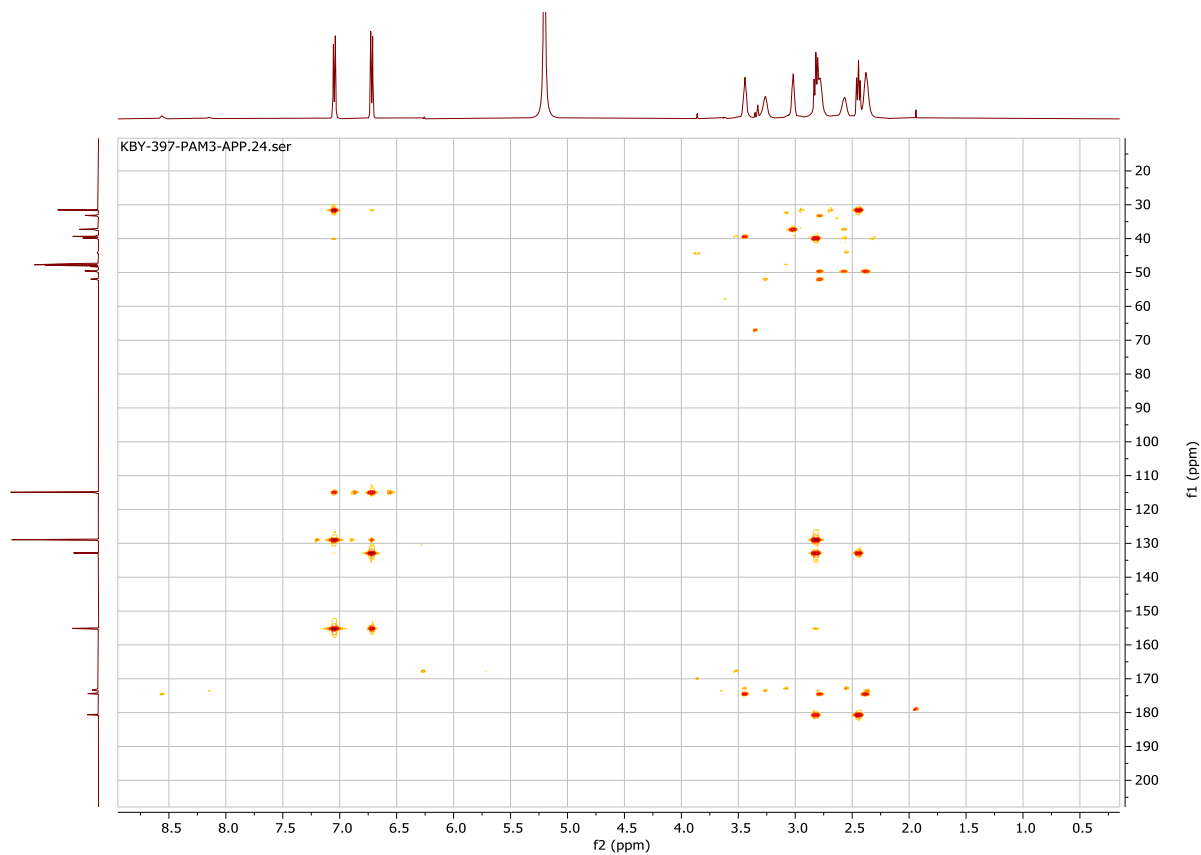

Figure S37:  $^1\text{H}$  NMR of PAMAM-1-FA in  $\text{CD}_3\text{OD}$

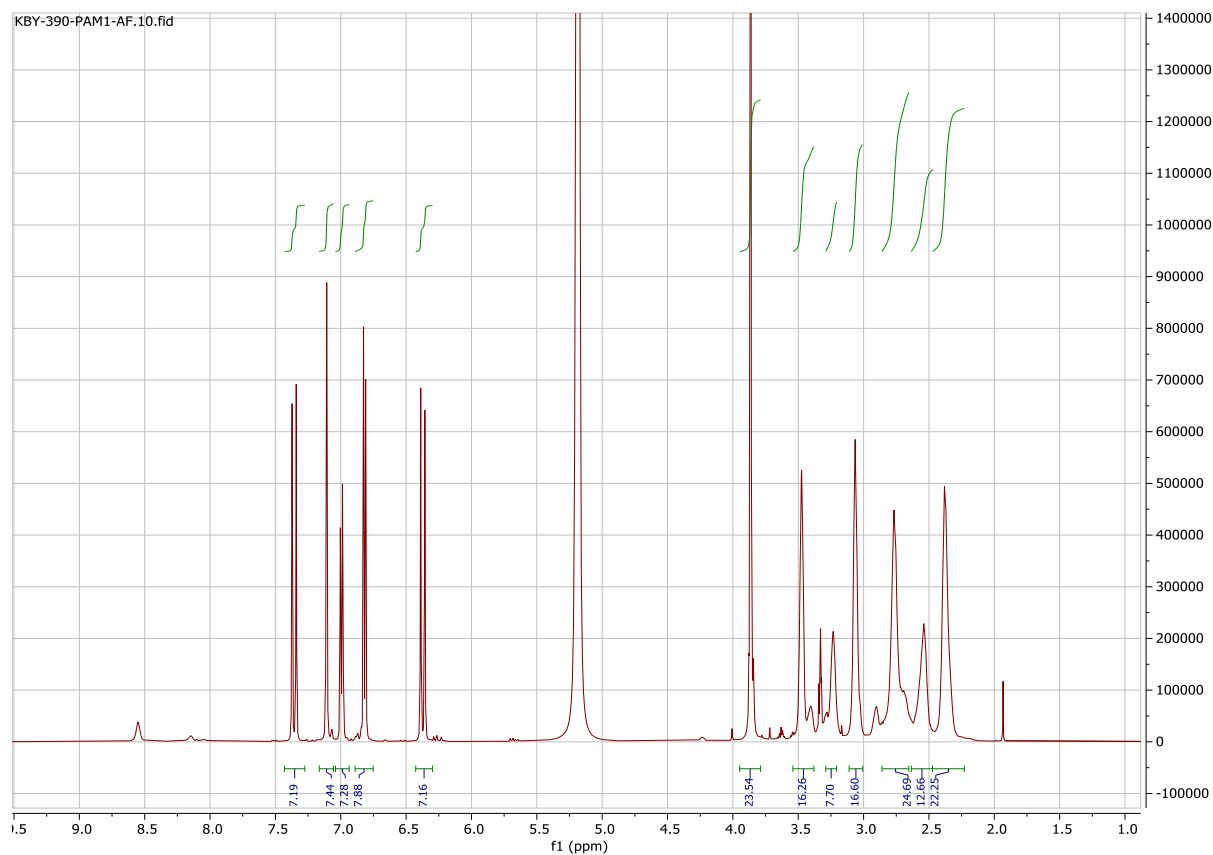

Figure S38:  $^{13}\text{C}$  NMR of PAMAM-1-FA in  $\text{CD}_3\text{OD}$

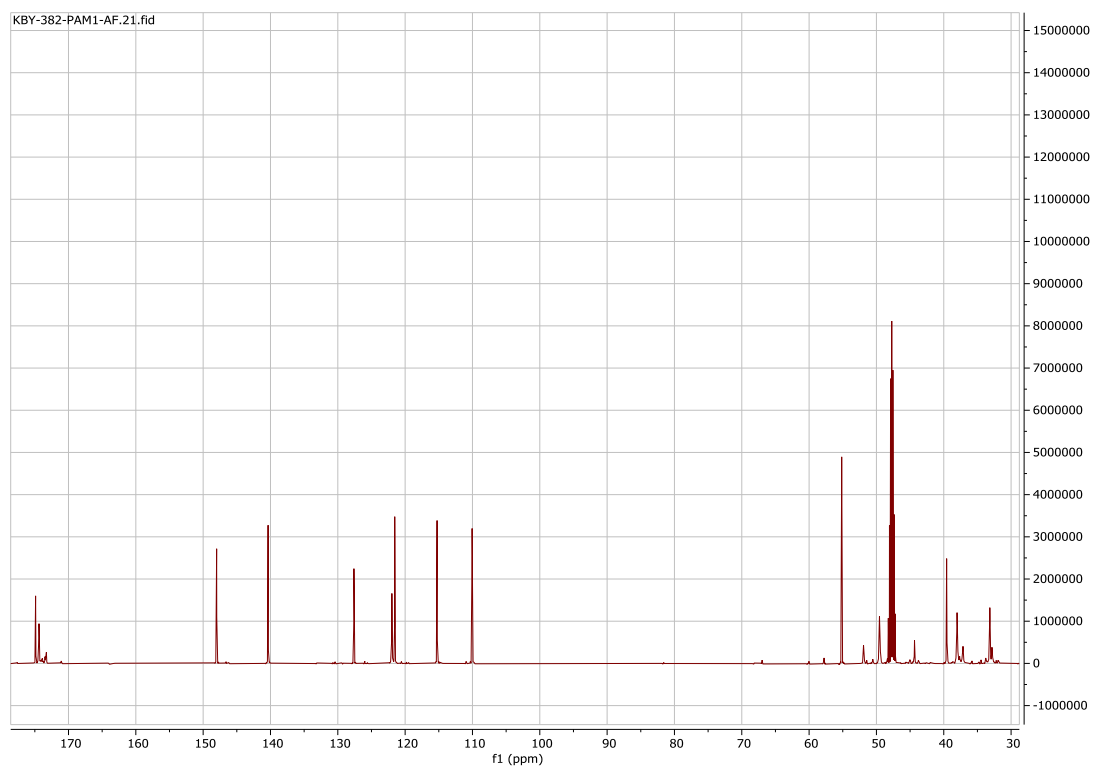

Figure S39:  $^1\text{H}$  NMR of PAMAM-2-FA in  $\text{CD}_3\text{OD}$

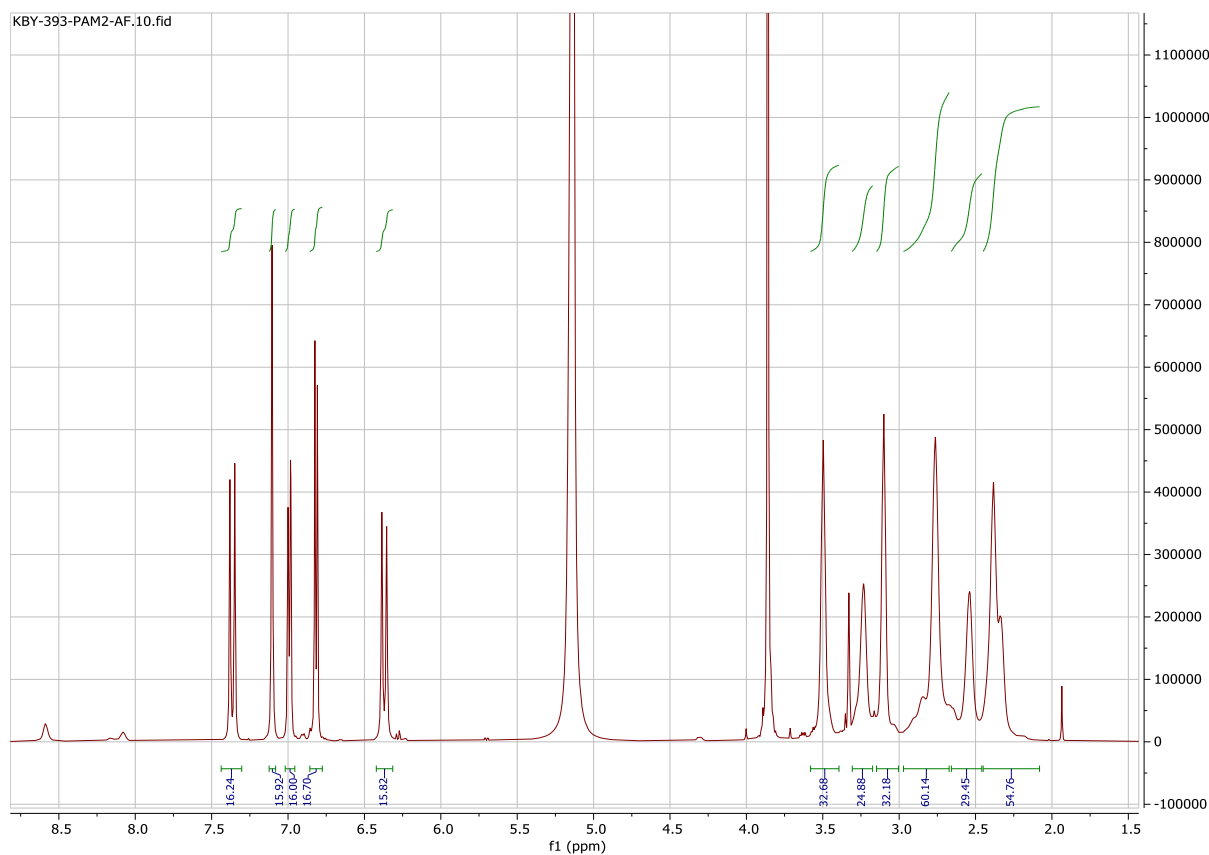

Figure S40: IR of PAMAM-2-FA

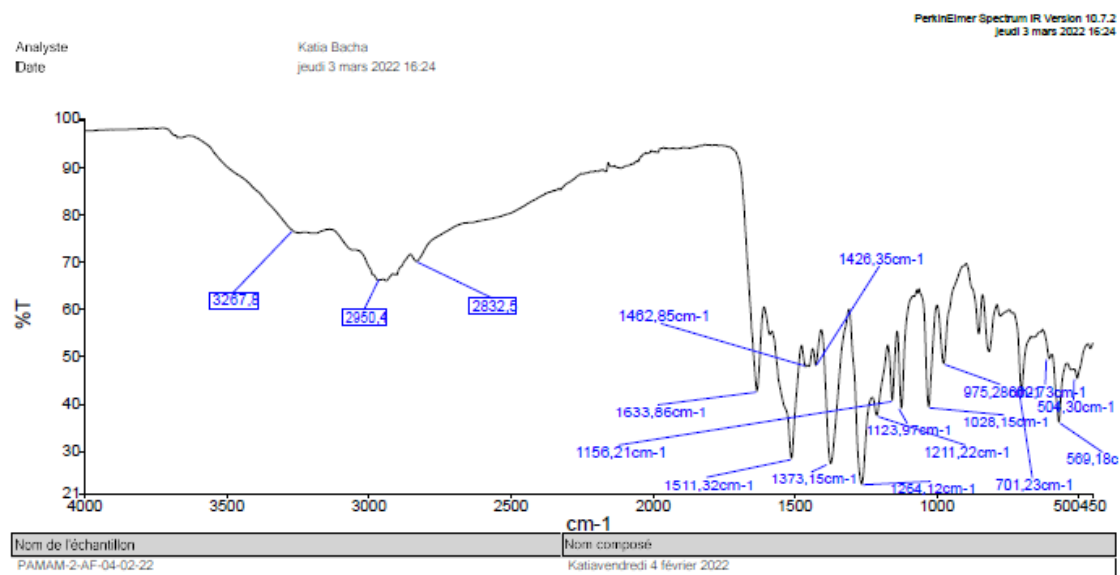

Figure S41:  $^1\text{H}$  NMR of PAMAM-1-CA in  $(\text{CD}_3)_2\text{SO}$

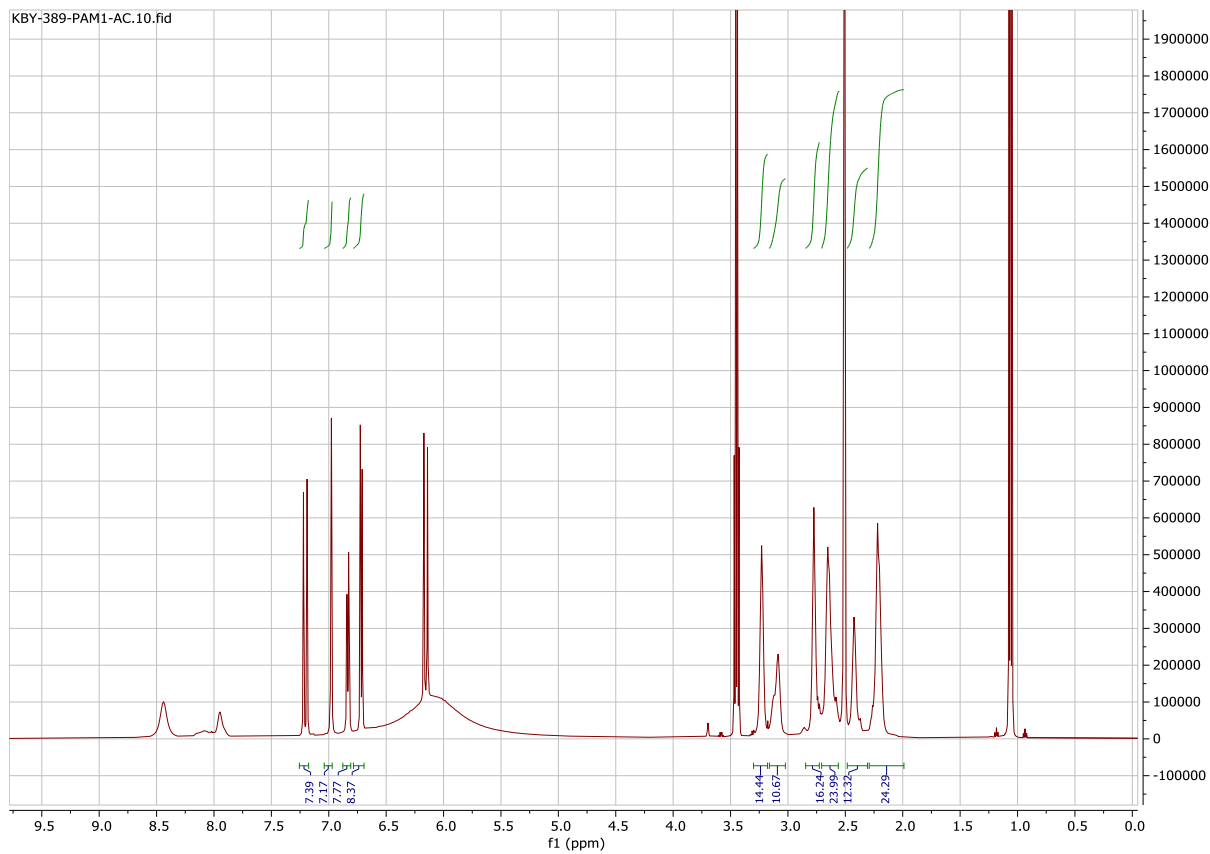

Figure S42:  $^{13}\text{C}$  NMR of PAMAM-1-CA in  $(\text{CD}_3)_2\text{SO}$

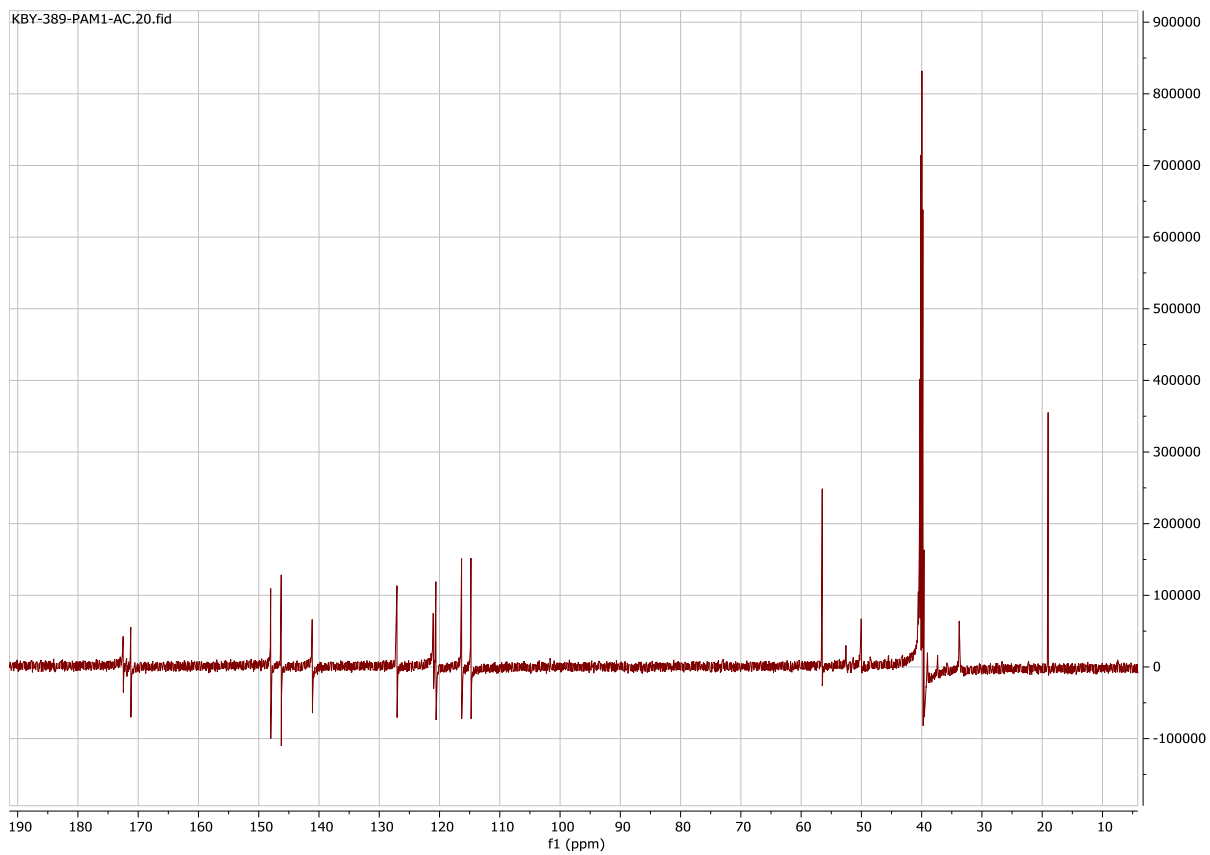

Figure S43: IR of PAMAM-1-CA

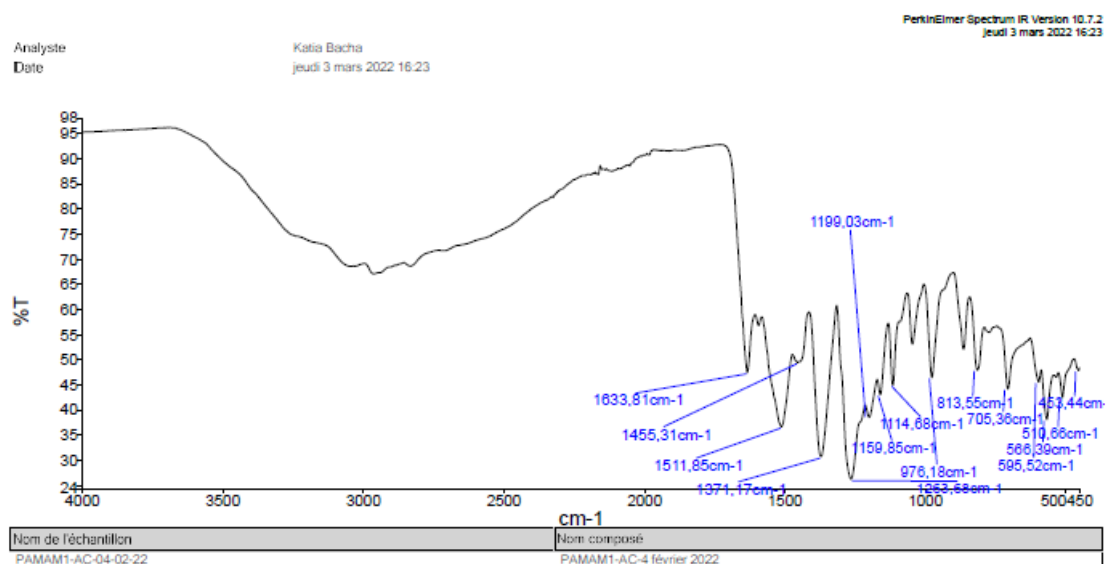

Figure S44: <sup>1</sup>H NMR of PAMAM-2-CA in (CD<sub>3</sub>)<sub>2</sub>SO

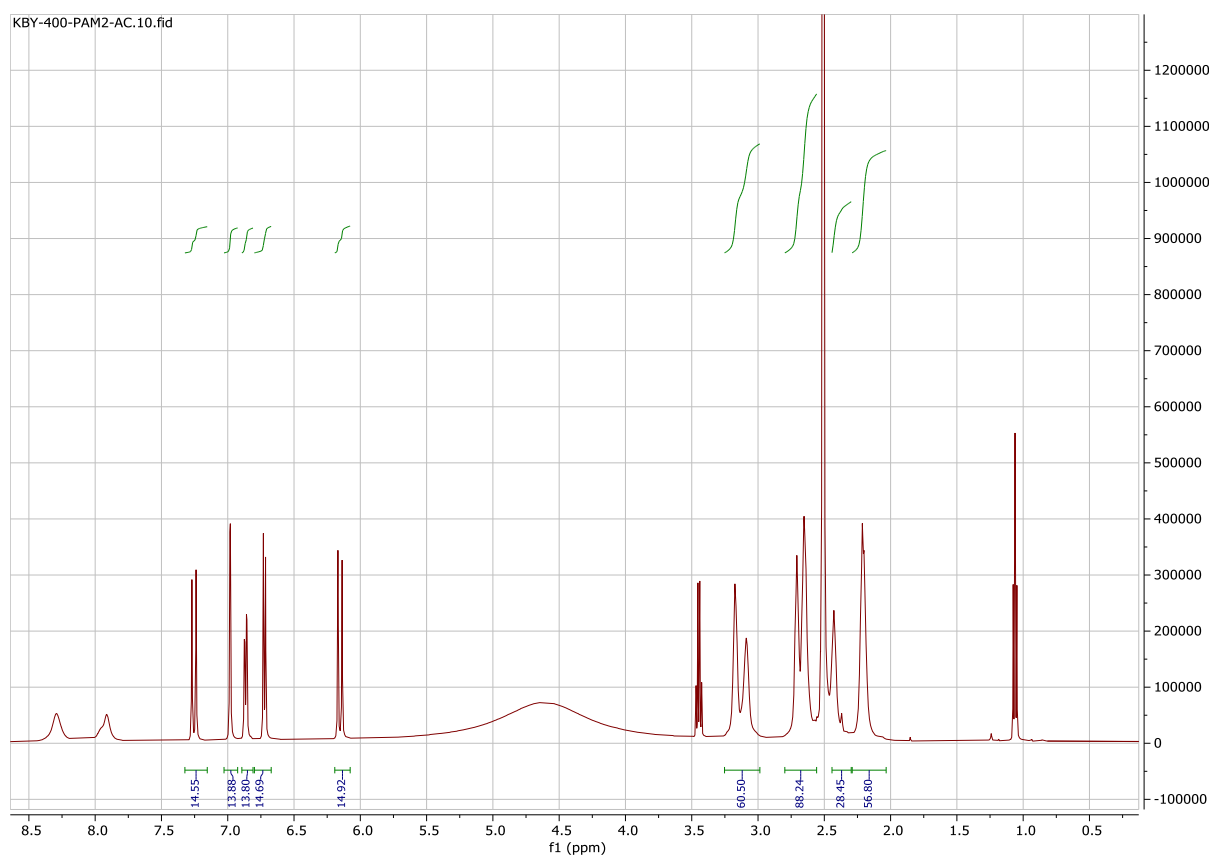

Figure S45: IR of PAMAM-2-CA

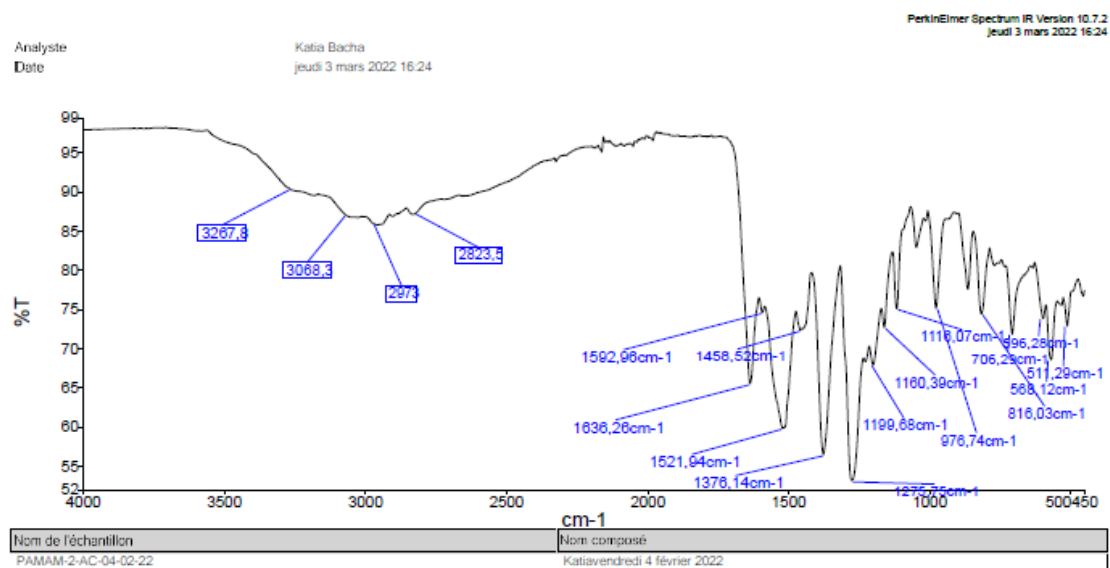

Figure S46: <sup>1</sup>H NMR of PAMAM-3-CA in (CD<sub>3</sub>)<sub>2</sub>SO

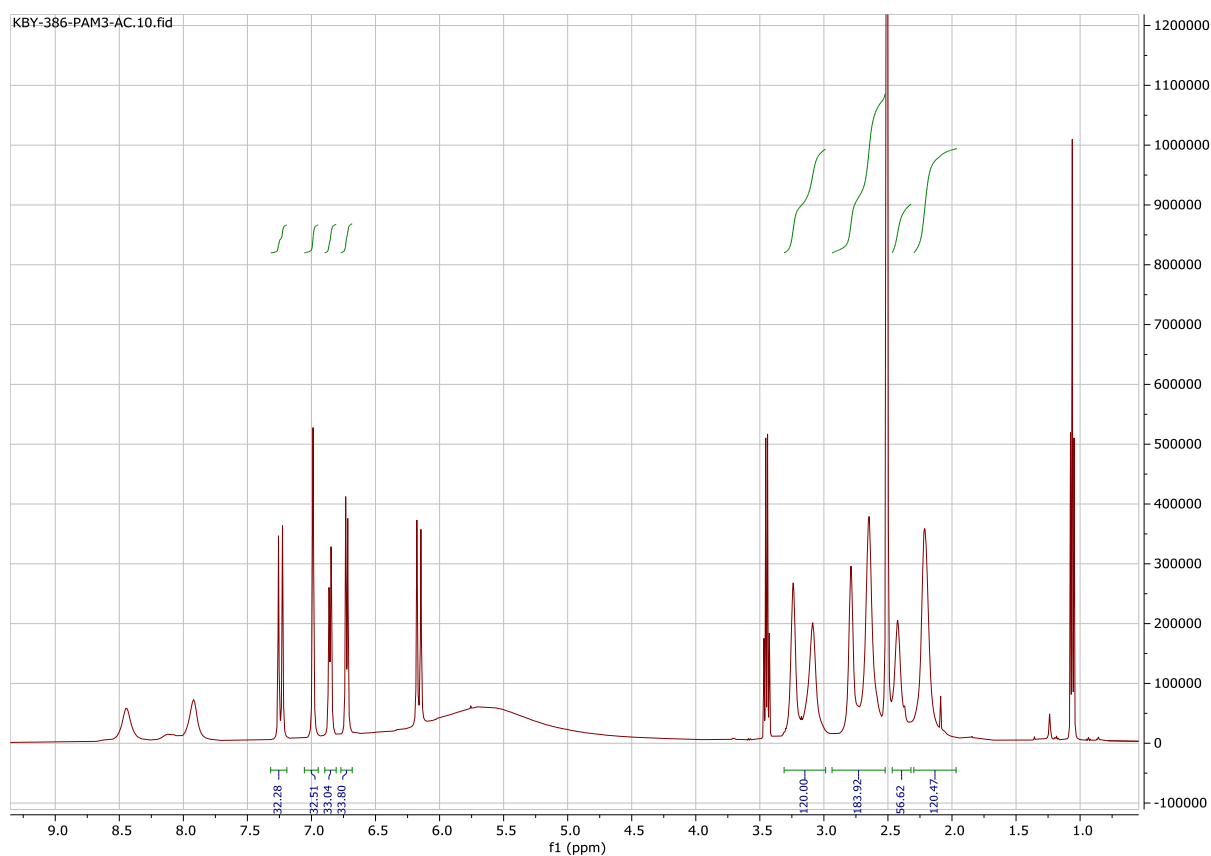

Figure S47: IR of PAMAM-3-CA

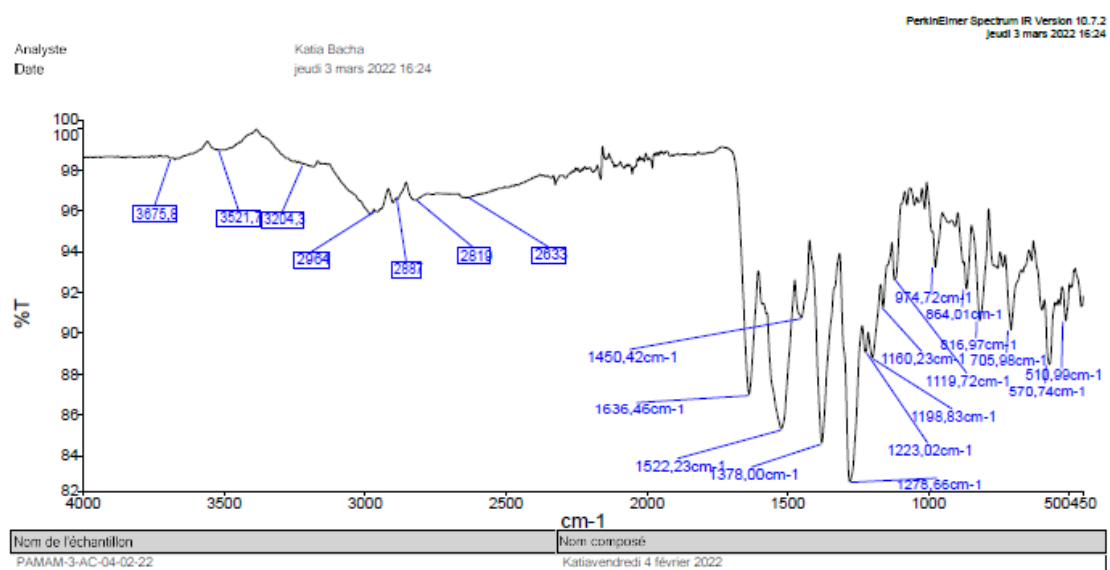

IR of PAMAM-3-CA



Figure S48: Inhibition of DPPH (300 $\mu$ mol or 118.3mg/L) by caffeic acid derived-PAMAM dendrimers

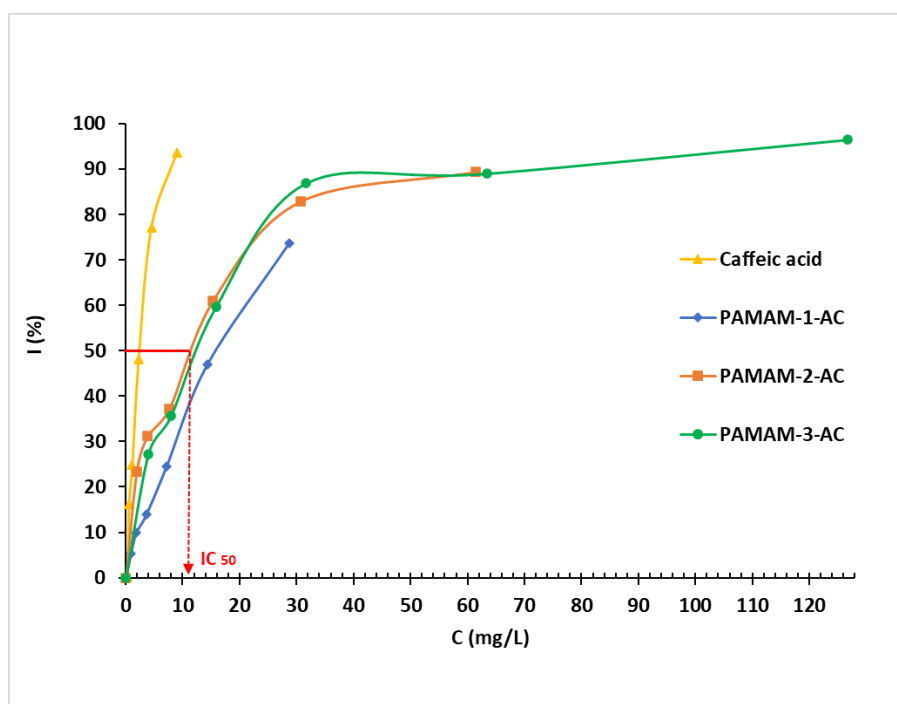

Figure S49: Inhibition of DPPH (300 $\mu$ mol or 118.3mg/L) by ionic antioxidant dendrimers

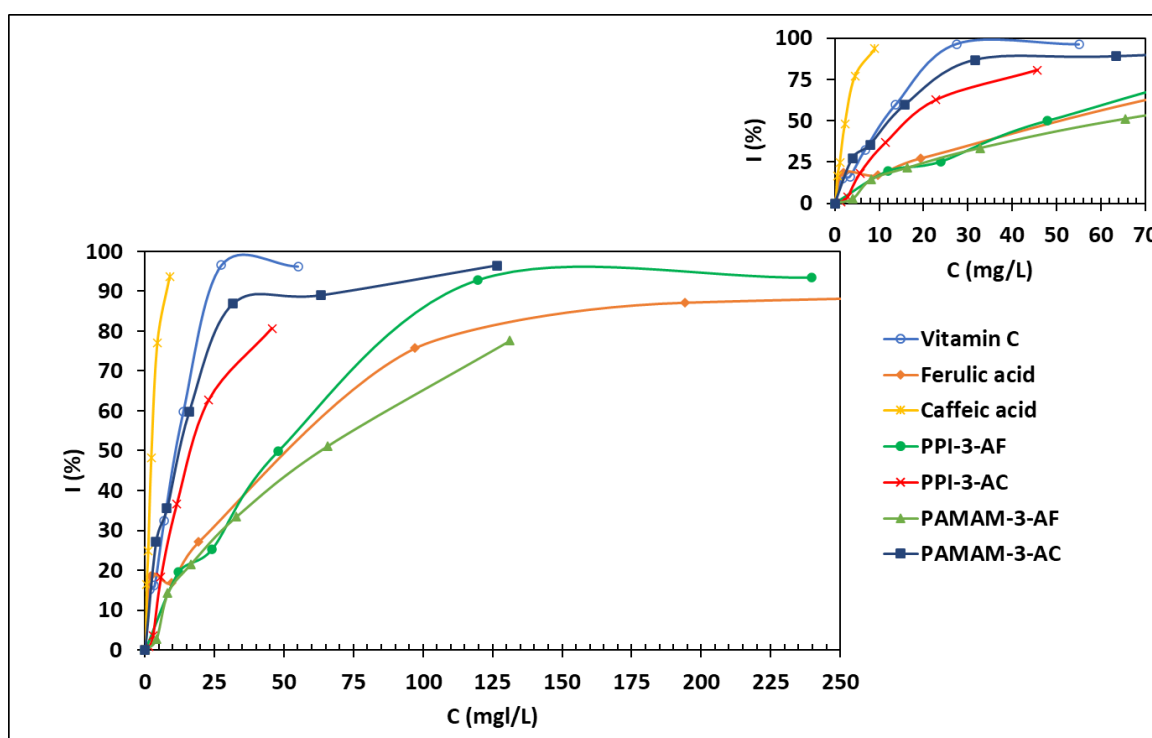

**Table S1: IC<sub>50</sub> (mg/L)**

| Entry | Samples                  | IC <sub>50</sub> (mg/L) | Standard deviation |
|-------|--------------------------|-------------------------|--------------------|
| 1     | Vitamin C                | 10.92                   | ± 0.3              |
| 2     | Ferulic acid             | 52.42                   | ± 4.6              |
| 3     | PPI-1-FA (4 FA units)    | 32.79                   | ± 1.9              |
| 4     | PPI-2-FA (8 FA units)    | 39.61                   | ± 4.9              |
| 5     | PPI-3-FA (16 FA units)   | 47.92                   | ± 12.4             |
| 6     | PAMAM-1-FA (8 FA units)  | 65.63                   | ± 5.9              |
| 7     | PAMAM-2-FA (16 FA units) | 54.72                   | ± 8.3              |
| 8     | PAMAM-3-FA (32 FA units) | 62.99                   | ± 10.5             |
| 9     | Caffeic acid             | 2.34                    | ± 0.2              |
| 10    | PPI-1-CA (4 CA units)    | 10.47                   | ± 1.3              |
| 11    | PPI-2-CA (8 CA units)    | 16.64                   | ± 2.2              |
| 12    | PPI-3-CA (16 CA units)   | 15.99                   | ± 5.0              |
| 13    | PAMAM-1-CA (8 CA units)  | 15.50                   | ± 3.1              |
| 14    | PAMAM-2-CA (16 CA units) | 11.04                   | ± 5.5              |
| 15    | PAMAM-3-CA (32 CA units) | 12.67                   | ± 5.1              |
| 16    | PAMAM-3-PhA              | 5868.44                 | ± 52.6             |
